# Supplementary material
Source: PubMed Central journal article supplement (PMC6489871)
Supplement: CNS-24-1196-s002.pdf [file CNS-24-1196-s002.pdf]

Supplementary Table S1 Sample information NGS data statistics

| Sample information |           |                | NGS data statistics                |                                              |
|--------------------|-----------|----------------|------------------------------------|----------------------------------------------|
| Family ID          | Sample ID | Proband gender | Average sequencing depth on target | Fraction of target covered with at least 20x |
| WS1                | WS1-P     | Male           | 125.55                             | 0.983                                        |
| WS1                | WS1-F     |                | 124.84                             | 0.978                                        |
| WS1                | WS1-M     |                | 174.45                             | 0.989                                        |
| WS2                | WS2-P     | Male           | 162.68                             | 0.984                                        |
| WS2                | WS2-F     |                | 149.26                             | 0.981                                        |
| WS2                | WS2-M     |                | 158.73                             | 0.986                                        |
| WS3                | WS3-P     | Male           | 157.49                             | 0.984                                        |
| WS3                | WS3-F     |                | 124.63                             | 0.976                                        |
| WS3                | WS3-M     |                | 124.21                             | 0.977                                        |
| WS4                | WS4-P     | Male           | 138.35                             | 0.985                                        |
| WS4                | WS4-F     |                | 139.14                             | 0.982                                        |
| WS4                | WS4-M     |                | 142.74                             | 0.985                                        |
| WS5                | WS5-P     | Male           | 160.11                             | 0.991                                        |
| WS5                | WS5-F     |                | 148.37                             | 0.985                                        |
| WS5                | WS5-M     |                | 143.94                             | 0.981                                        |
| WS6                | WS6-P     | Male           | 161.96                             | 0.987                                        |
| WS6                | WS6-F     |                | 161.03                             | 0.986                                        |
| WS6                | WS6-M     |                | 164.52                             | 0.985                                        |
| WS7                | WS7-P     | Male           | 153.05                             | 0.989                                        |
| WS7                | WS7-F     |                | 135.77                             | 0.981                                        |
| WS7                | WS7-M     |                | 123.62                             | 0.976                                        |
| WS8                | WS8-P     | Female         | 157.02                             | 0.988                                        |
| WS8                | WS8-F     |                | 173.93                             | 0.988                                        |
| WS8                | WS8-M     |                | 176.61                             | 0.984                                        |
| WS9                | WS9-P     | Male           | 160.05                             | 0.993                                        |
| WS9                | WS9-F     |                | 166.48                             | 0.987                                        |
| WS9                | WS9-M     |                | 137.19                             | 0.979                                        |
| WS10               | WS10-P    | Female         | 155.77                             | 0.985                                        |
| WS10               | WS10-F    |                | 164.07                             | 0.986                                        |

|      |        |        |        |       |
|------|--------|--------|--------|-------|
| WS10 | WS10-M |        | 159.8  | 0.984 |
| WS11 | WS11-P | Male   | 164.86 | 0.992 |
| WS11 | WS11-F |        | 147.95 | 0.984 |
| WS11 | WS11-M |        | 161.81 | 0.985 |
| WS12 | WS12-P | Male   | 132.81 | 0.986 |
| WS12 | WS12-F |        | 149.09 | 0.981 |
| WS12 | WS12-M |        | 139.88 | 0.983 |
| WS13 | WS13-P | Male   | 165.14 | 0.985 |
| WS13 | WS13-F |        | 132.46 | 0.974 |
| WS13 | WS13-M |        | 130.61 | 0.969 |
| WS14 | WS14-P | Male   | 132.49 | 0.984 |
| WS14 | WS14-F |        | 151.68 | 0.981 |
| WS14 | WS14-M |        | 168.36 | 0.988 |
| WS15 | WS15-P | Male   | 156.18 | 0.99  |
| WS15 | WS15-F |        | 161.3  | 0.986 |
| WS15 | WS15-M |        | 151.99 | 0.984 |
| WS16 | WS16-P | Male   | 172.68 | 0.987 |
| WS16 | WS16-F |        | 154.36 | 0.981 |
| WS16 | WS16-M |        | 143.18 | 0.973 |
| WS17 | WS17-P | Male   | 134.73 | 0.985 |
| WS17 | WS17-F |        | 141.47 | 0.985 |
| WS17 | WS17-M |        | 171.75 | 0.988 |
| WS18 | WS18-P | Female | 176.45 | 0.985 |
| WS18 | WS18-F |        | 155.33 | 0.985 |
| WS18 | WS18-M |        | 156.11 | 0.985 |
| WS19 | WS19-P | Female | 182.15 | 0.988 |
| WS19 | WS19-F |        | 138.59 | 0.981 |
| WS19 | WS19-M |        | 149.98 | 0.981 |
| WS20 | WS20-P | Female | 168.77 | 0.986 |
| WS20 | WS20-F |        | 153.92 | 0.985 |
| WS20 | WS20-M |        | 146.39 | 0.985 |
| WS21 | WS21-P | Female | 169.75 | 0.984 |
| WS21 | WS21-F |        | 131.81 | 0.979 |

|      |        |        |        |       |
|------|--------|--------|--------|-------|
| WS21 | WS21-M |        | 144.42 | 0.982 |
| WS22 | WS22-P | Male   | 140.36 | 0.988 |
| WS22 | WS22-F |        | 150.5  | 0.984 |
| WS22 | WS22-M |        | 152.17 | 0.982 |
| WS23 | WS23-P | Male   | 179.96 | 0.986 |
| WS23 | WS23-F |        | 162.38 | 0.986 |
| WS23 | WS23-M |        | 159.48 | 0.986 |
| WS24 | WS24-P | Male   | 156.94 | 0.984 |
| WS24 | WS24-F |        | 127.83 | 0.98  |
| WS24 | WS24-M |        | 140.27 | 0.982 |
| WS25 | WS25-P | Male   | 155.4  | 0.981 |
| WS25 | WS25-F |        | 143.07 | 0.981 |
| WS25 | WS25-M |        | 160.65 | 0.983 |
| WS26 | WS26-P | Female | 177.11 | 0.98  |
| WS26 | WS26-F |        | 132.97 | 0.979 |
| WS26 | WS26-M |        | 169.72 | 0.986 |
| WS27 | WS27-P | Male   | 188.66 | 0.987 |
| WS27 | WS27-F |        | 163.03 | 0.986 |
| WS27 | WS27-M |        | 160.95 | 0.986 |
| WS28 | WS28-P | Male   | 154.69 | 0.987 |
| WS28 | WS28-F |        | 130.14 | 0.981 |
| WS28 | WS28-M |        | 162.05 | 0.983 |
| WS29 | WS29-P | Male   | 173.77 | 0.986 |
| WS29 | WS29-F |        | 144.56 | 0.982 |
| WS29 | WS29-M |        | 139.19 | 0.983 |
| WS30 | WS30-P | Male   | 157.87 | 0.987 |
| WS30 | WS30-F |        | 153.9  | 0.981 |
| WS30 | WS30-M |        | 187.49 | 0.986 |
| WS31 | WS31-P | Male   | 150.54 | 0.99  |
| WS31 | WS31-F |        | 148.25 | 0.983 |
| WS31 | WS31-M |        | 130.31 | 0.98  |
| WS32 | WS32-P | Male   | 166.72 | 0.984 |
| WS32 | WS32-F |        | 151.11 | 0.983 |

|      |        |        |        |       |
|------|--------|--------|--------|-------|
| WS32 | WS32-M |        | 170.54 | 0.987 |
| WS33 | WS33-P | Male   | 138.28 | 0.986 |
| WS33 | WS33-F |        | 159.84 | 0.986 |
| WS33 | WS33-M |        | 159.39 | 0.984 |
| WS34 | WS34-P | Female | 133.09 | 0.984 |
| WS34 | WS34-F |        | 153.32 | 0.984 |
| WS34 | WS34-M |        | 142.42 | 0.981 |
| WS35 | WS35-P | Male   | 164.82 | 0.983 |
| WS35 | WS35-F |        | 168.35 | 0.984 |
| WS35 | WS35-M |        | 158.76 | 0.986 |
| WS36 | WS36-P | Male   | 162.22 | 0.987 |
| WS36 | WS36-F |        | 156.53 | 0.984 |
| WS36 | WS36-M |        | 158.5  | 0.985 |
| WS37 | WS37-P | Female | 152.29 | 0.982 |
| WS37 | WS37-F |        | 132.29 | 0.981 |
| WS37 | WS37-M |        | 141.11 | 0.982 |
| WS38 | WS38-P | Female | 184.05 | 0.987 |
| WS38 | WS38-F |        | 150.19 | 0.985 |
| WS38 | WS38-M |        | 141.6  | 0.981 |
| WS39 | WS39-P | Male   | 155.85 | 0.99  |
| WS39 | WS39-F |        | 165.15 | 0.986 |
| WS39 | WS39-M |        | 184.45 | 0.993 |
| WS40 | WS40-P | Male   | 162.07 | 0.982 |
| WS40 | WS40-F |        | 164.71 | 0.987 |
| WS40 | WS40-M |        | 147.78 | 0.979 |
| WS41 | WS41-P | Female | 155.29 | 0.981 |
| WS41 | WS41-F |        | 140.16 | 0.983 |
| WS41 | WS41-M |        | 133.02 | 0.981 |
| WS42 | WS42-P | Female | 117.81 | 0.982 |
| WS42 | WS42-F |        | 125.94 | 0.979 |
| WS42 | WS42-M |        | 168.46 | 0.986 |
| WS43 | WS43-P | Female | 161.04 | 0.985 |
| WS43 | WS43-F |        | 127.65 | 0.976 |

|      |        |        |        |       |
|------|--------|--------|--------|-------|
| WS43 | WS43-M |        | 135.73 | 0.984 |
| WS44 | WS44-P | Female | 167.76 | 0.983 |
| WS44 | WS44-F |        | 130.18 | 0.977 |
| WS44 | WS44-M |        | 136.64 | 0.979 |
| WS45 | WS45-P | Male   | 154.86 | 0.987 |
| WS45 | WS45-F |        | 156.64 | 0.985 |
| WS45 | WS45-M |        | 127.39 | 0.98  |
| WS46 | WS46-P | Male   | 156.83 | 0.983 |
| WS46 | WS46-F |        | 140.31 | 0.975 |
| WS46 | WS46-M |        | 178.56 | 0.981 |
| WS47 | WS47-P | Male   | 147.28 | 0.988 |
| WS47 | WS47-F |        | 142.94 | 0.992 |
| WS47 | WS47-M |        | 158.77 | 0.99  |
| WS48 | WS48-P | Male   | 155.76 | 0.989 |
| WS48 | WS48-F |        | 152.19 | 0.984 |
| WS48 | WS48-M |        | 122.1  | 0.979 |
| WS49 | WS49-P | Male   | 160.61 | 0.982 |
| WS49 | WS49-F |        | 163.63 | 0.984 |
| WS49 | WS49-M |        | 138.12 | 0.981 |
| WS50 | WS50-P | Female | 170.35 | 0.983 |
| WS50 | WS50-F |        | 171.27 | 0.985 |
| WS50 | WS50-M |        | 170.66 | 0.984 |
| WS51 | WS51-P | Male   | 130.53 | 0.984 |
| WS51 | WS51-F |        | 180.78 | 0.988 |
| WS51 | WS51-M |        | 175.82 | 0.985 |
| WS52 | WS52-P | Female | 153.46 | 0.982 |
| WS52 | WS52-F |        | 157.49 | 0.981 |
| WS52 | WS52-M |        | 135.14 | 0.981 |
| WS53 | WS53-P | Male   | 116.79 | 0.977 |
| WS53 | WS53-F |        | 157.49 | 0.987 |
| WS53 | WS53-M |        | 172.37 | 0.988 |
| WS54 | WS54-P | Female | 127.37 | 0.98  |
| WS54 | WS54-F |        | 142.33 | 0.983 |

|      |        |        |        |       |
|------|--------|--------|--------|-------|
| WS54 | WS54-M |        | 219.59 | 0.99  |
| WS55 | WS55-P | Male   | 144.06 | 0.988 |
| WS55 | WS55-F |        | 132.62 | 0.983 |
| WS55 | WS55-M |        | 139.22 | 0.983 |
| WS56 | WS56-P | Female | 144.45 | 0.985 |
| WS56 | WS56-F |        | 126.68 | 0.982 |
| WS56 | WS56-M |        | 162.91 | 0.991 |

---

Supplementary Table S2 Sample age and gender used in mRNA express analysis

| Age (year)   | Number of male samples | Number of female samples | Total |
|--------------|------------------------|--------------------------|-------|
| -0.421917808 | 16                     |                          | 350   |
| -0.402739726 | 15                     | 16                       | 31    |
| -0.364383562 | 0                      | 11                       | 11    |
| -0.326027397 | 0                      | 14                       | 14    |
| -0.306849315 | 39                     | 0                        | 39    |
| -0.249315068 | 28                     | 16                       | 44    |
| -0.230136986 | 0                      | 46                       | 46    |
| -0.17260274  | 14                     | 0                        | 14    |
| -0.153424658 | 16                     | 0                        | 16    |
| 0.3          | 15                     | 0                        | 15    |
| 0.333333333  | 32                     | 0                        | 32    |
| 0.5          | 0                      | 16                       | 16    |
| 0.671232877  | 0                      | 13                       | 13    |
| 0.833333333  | 11                     | 0                        | 11    |
| 1            | 0                      | 16                       | 16    |
| 2            | 0                      | 16                       | 16    |
| Total        | 186                    | 164                      | 350   |

Supplementary Table S3 mRNA expression data of candidate genes in different region of brain in 350 normal fetus and &lt;3 years old children

| Gene     | Gender | A1C       | AMY      | CBC      | DFC      | HIP      | IPC      | ITC      | MIC      | MD       | MFC      | OFC      | S1C      | STC      | STR      | V1C      | VFC      |
|----------|--------|-----------|----------|----------|----------|----------|----------|----------|----------|----------|----------|----------|----------|----------|----------|----------|----------|
| ABCA7    | F      | 1.623333  | 1.772727 | 10.69714 | 1.666923 | 1.978333 | 2.074545 | 1.684545 | 2.2375   | 5.508888 | 1.946153 | 1.767272 | 1.961111 | 1.77     | 2.193333 | 2.832727 | 1.896666 |
|          |        | 333       | 273      | 286      | 077      | 333      | 455      | 455      | 889      | 846      | 727      | 11       | 333      | 273      | 667      |          |          |
| C9orf163 | F      | 0.245555  | 0.25     | 0.432857 | 0.203076 | 0.233333 | 0.241818 | 0.221818 | 0.16875  | 0.123333 | 0.219230 | 0.160909 | 0.163333 | 0.214545 | 0.217777 | 0.214545 | 0.151666 |
|          |        | 556       |          | 143      | 923      | 333      | 182      | 182      | 333      | 769      | 091      | 333      | 455      | 778      | 455      | 667      |          |
| CASD1    | F      | 11.87888  | 13.23181 | 15.33428 | 15.82846 | 14.45583 | 12.37636 | 12.71909 | 14.66125 | 15.82222 | 15.76769 | 16.77909 | 15.21111 | 11.56909 | 14.49444 | 11.65545 | 14.23583 |
|          |        | 889       | 818      | 571      | 154      | 333      | 364      | 091      | 222      | 231      | 091      | 11       | 091      | 444      | 455      | 333      |          |
| CES4A    | F      | 4.981111  | 3.880909 | 7.73     | 3.606153 | 3.908333 | 5.232727 | 5.267272 | 4.43875  | 1.927777 | 5.302307 | 4.02     | 4.446666 | 6.04     | 3.887777 | 7.562727 | 5.8625   |
|          |        | 11        | 091      | 846      | 333      | 273      | 727      | 778      | 692      | 667      | 778      | 273      |          |          |          |          |          |
| COL9A2   | F      | 11.321111 | 15.47272 | 12.75714 | 7.803846 | 16.445   | 9.64     | 11.53090 | 11.80125 | 9.313333 | 10.18153 | 14.04272 | 7.384444 | 12.67636 | 17.07777 | 14.70090 | 7.459166 |
|          |        | 11        | 727      | 286      | 154      | 909      | 333      | 846      | 727      | 444      | 364      | 778      | 909      | 667      |          |          |          |
| CYFIP2   | F      | 88.72111  | 81.57909 | 90.99857 | 86.09076 | 78.05166 | 102.4345 | 88.58454 | 96.54625 | 125.7677 | 81.82153 | 80.98090 | 99.43222 | 90.90727 | 72.02111 | 95.64181 | 95.90583 |
|          |        | 111       | 091      | 143      | 923      | 667      | 455      | 545      | 778      | 846      | 909      | 222      | 273      | 111      | 818      | 333      |          |
| DOCK2    | F      | 0.611111  | 0.641818 | 0.818571 | 0.589230 | 0.72     | 0.502727 | 0.54     | 0.575    | 0.95     | 0.52     | 0.62     | 0.505555 | 0.592727 | 0.665555 | 0.545454 | 0.644166 |
|          |        | 11        | 182      | 429      | 769      | 273      | 556      | 273      | 556      | 545      | 667      |          |          |          |          |          |          |
| FAT3     | F      | 13.31666  | 9.12     | 4.485714 | 12.51692 | 5.209166 | 17.22363 | 10.05636 | 19.025   | 12.19555 | 10.11076 | 9.130909 | 17.18111 | 11.86727 | 23.69222 | 17.43363 | 12.05083 |
|          |        | 667       | 286      | 308      | 667      | 636      | 364      | 556      | 923      | 091      | 111      | 273      | 222      | 636      | 333      |          |          |
| GNB1     | F      | 454.5077  | 415.3990 | 414.6714 | 448.0561 | 366.5758 | 477.8863 | 443.5654 | 471.6675 | 388.71   | 393.9030 | 395.88   | 476.5011 | 436.5172 | 435.2288 | 444.8163 | 484.6491 |
|          |        | 778       | 909      | 286      | 538      | 333      | 636      | 545      | 769      | 111      | 727      | 889      | 636      | 667      |          |          |          |
| KMT2D    | F      | 10.56555  | 11.15636 | 13.85285 | 9.552307 | 8.885    | 11.66181 | 9.991818 | 11.80375 | 6.807777 | 9.193076 | 8.802727 | 9.787777 | 10.37090 | 11.09444 | 12.58818 | 11.415   |
|          |        | 556       | 364      | 714      | 692      | 818      | 182      | 778      | 923      | 273      | 778      | 909      | 444      | 182      |          |          |          |
| MAP3K12  | F      | 16.59888  | 14.07363 | 41.04142 | 14.97923 | 13.72166 | 18.31    | 15.68181 | 16.3325  | 13.06    | 16.05307 | 13.84727 | 17.45333 | 16.42909 | 13.81777 | 18.40727 | 17.86    |
|          |        | 889       | 636      | 857      | 077      | 667      | 818      | 692      | 273      | 333      | 091      | 778      | 273      |          |          |          |          |
| MYCBP2   | F      | 32.21     | 33.44636 | 31.80571 | 30.99692 | 26.96    | 37.24636 | 35.74727 | 39.23375 | 28.37222 | 27.88769 | 24.21909 | 36.93222 | 34.22090 | 35.01666 | 36.76636 | 37.775   |
|          |        | 364       | 429      | 308      | 364      | 273      | 222      | 231      | 091      | 222      | 909      | 667      | 364      |          |          |          |          |
| MYO1H    | F      | 0.1       | 0.160909 | 0.064285 | 0.098461 | 0.169166 | 0.152727 | 0.085454 | 0.05375  | 0.078888 | 0.157692 | 0.037272 | 0.05     | 0.133636 | 0.054444 | 0.213636 | 0.070833 |
|          |        | 091       | 714      | 538      | 667      | 273      | 545      | 889      | 308      | 727      | 364      | 444      | 364      | 333      |          |          |          |
| NPC1L1   | F      | 0.004444  | 0.003636 | 0.04     | 0.009230 | 0.011666 | 0.011818 | 0.01     | 0.0025   | 0.006666 | 0.022307 | 0.015454 | 0.008888 | 0.018181 | 0.006666 | 0.015454 | 0.020833 |
|          |        | 444       | 364      | 769      | 667      | 182      | 667      | 692      | 545      | 889      | 818      | 667      | 545      | 333      |          |          |          |
| PNMA1    | F      | 121.7944  | 111.3345 | 116.4542 | 124.9161 | 117.5383 | 135.9981 | 127.75   | 128.1325 | 118.5866 | 122.9892 | 115.5181 | 128.8966 | 124.08   | 125.1966 | 129.1290 | 128.9375 |
|          |        | 444       | 455      | 857      | 538      | 333      | 818      | 667      | 308      | 818      | 667      | 667      | 909      |          |          |          |          |



|         |   |          |          |          |          |          |          |          |          |          |          |          |          |          |          |          |          |
|---------|---|----------|----------|----------|----------|----------|----------|----------|----------|----------|----------|----------|----------|----------|----------|----------|----------|
| POFUT2  | F | 4.412222 | 6.041818 | 9.795714 | 4.803076 | 6.569166 | 4.410909 | 4.675454 | 4.38875  | 5.616666 | 5.65     | 5.43     | 4.248888 | 4.930909 | 5.325555 | 4.982727 | 5.200833 |
|         |   | 222      | 182      | 286      | 923      | 667      | 091      | 545      |          | 667      |          |          | 889      | 091      | 556      | 273      | 333      |
| RYR1    | F | 2.477777 | 2.908181 | 4.138571 | 1.324615 | 3.474166 | 2.069090 | 1.63     | 3.16875  | 2.756666 | 2.154615 | 2.413636 | 1.658888 | 2.11     | 2.291111 | 1.478181 | 2.451666 |
|         |   | 778      | 818      | 429      | 385      | 667      | 909      |          |          | 667      | 385      | 364      | 889      |          | 11       | 818      | 667      |
| RYR3    | F | 2.565555 | 2.117272 | 4.151428 | 1.502307 | 2.1475   | 2.722727 | 2.677272 | 2.8      | 1.614444 | 1.911538 | 1.568181 | 2.166666 | 2.782727 | 3.202222 | 2.720909 | 2.319166 |
|         |   | 556      | 727      | 571      | 692      |          | 273      | 727      |          | 444      | 462      | 818      | 667      | 273      | 222      | 091      | 667      |
| VWA3A   | F | 0.276666 | 0.597272 | 0.404285 | 0.113076 | 0.571666 | 0.205454 | 0.293636 | 0.3075   | 0.676666 | 0.207692 | 0.248181 | 0.168888 | 0.225454 | 0.395555 | 0.168181 | 0.130833 |
|         |   | 667      | 727      | 714      | 923      | 667      | 545      | 364      |          | 667      | 308      | 818      | 889      | 545      | 556      | 818      | 333      |
| ACE2    | M | 0.018    | 0.045    | 0.075555 | 0.024545 | 0.067272 | 0.022727 | 0.056666 | 0.02     | 0.058181 | 0.02     | 0.066    | 0.026666 | 0.013333 | 0.050909 | 0.031    | 0.032727 |
|         |   |          |          | 556      | 455      | 727      | 273      | 667      |          | 818      |          |          | 667      | 333      | 091      |          | 273      |
| ADGRG4  | M | #N/A     |
| ALG3    | M | 6.673    | 6.887    | 8.923333 | 7.032727 | 7.064545 | 5.988181 | 6.54     | 7.206666 | 7.256363 | 6.88     | 6.428    | 6.477777 | 6.415555 | 7.756363 | 7.735    | 6.883636 |
|         |   |          |          | 333      | 273      | 455      | 818      |          | 667      | 636      |          |          | 778      | 556      | 636      |          | 364      |
| ARHGAP1 | M | 8.483    | 10.974   | 12.70555 | 8.909090 | 10.59818 | 7.833636 | 5.846666 | 7.697777 | 8.319090 | 8.657272 | 9.315    | 7.861111 | 7.964444 | 9.440909 | 8.365    | 9.429090 |
| 7       |   |          |          | 556      | 909      | 182      | 364      | 667      | 778      | 909      | 727      |          | 11       | 444      | 091      |          | 909      |
| ARSF    | M | 0.816    | 1.048    | 0.314444 | 0.898181 | 2.340909 | 0.77     | 1.005555 | 0.698888 | 0.852727 | 0.77     | 0.87     | 0.657777 | 0.907777 | 1.03     | 0.904    | 0.78     |
|         |   |          |          | 444      | 818      | 091      |          | 556      | 889      | 273      |          |          | 778      | 778      |          |          |          |
| ATP2A2  | M | 70.154   | 56.507   | 68.69222 | 64.99    | 61.02363 | 65.31909 | 61.42444 | 70.54888 | 78.48545 | 58.15090 | 65.736   | 69.17222 | 67.68333 | 62.72363 | 70.773   | 68.20909 |
|         |   |          |          | 222      |          | 636      | 091      | 444      | 889      | 455      | 909      |          | 222      | 333      | 636      |          | 091      |
| AWAT1   | M | 0.008    | 0        | 0.077777 | 0.02     | 0        | 0.011818 | 0        | 0.011111 | 0.005454 | 0.006363 | 0        | 0        | 0        | 0        | 0.003    | 0.002727 |
|         |   |          |          | 778      |          |          | 182      |          | 11       | 545      | 636      |          |          |          |          |          | 273      |
| CAT     | M | 12.531   | 19.656   | 17.50555 | 13.95818 | 20.56090 | 14.27090 | 12.27333 | 12.66111 | 11.89363 | 12.95454 | 13.735   | 14.29888 | 12.41333 | 13.67090 | 15.305   | 12.45090 |
|         |   |          |          | 556      | 182      | 909      | 909      | 333      | 111      | 636      | 545      |          | 889      | 333      | 909      |          | 909      |
| CCDC120 | M | 6.322    | 5.443    | 7        | 6.871818 | 4.840909 | 5.228181 | 4.498888 | 5.655555 | 5.242727 | 5.211818 | 5.186    | 5.65     | 7.188888 | 5.004545 | 6.696    | 5.981818 |
|         |   |          |          |          | 182      | 091      | 818      | 889      | 556      | 273      | 182      |          |          | 889      | 455      |          | 182      |
| CCDC14  | M | 12.424   | 16.006   | 10.59777 | 13.38181 | 13.29727 | 11.27363 | 10.20111 | 11.69222 | 6.275454 | 11.92181 | 12.201   | 11.59777 | 11.37333 | 12.81545 | 14.822   | 13.91363 |
|         |   |          |          | 778      | 818      | 273      | 636      | 111      | 222      | 545      | 818      |          | 778      | 333      | 455      |          | 636      |
| CCPG1   | M | 12.388   | 8.442    | 12.66666 | 9.953636 | 9.903636 | 13.15727 | 10.21777 | 9.537777 | 9.406363 | 9.518181 | 9.353    | 11.03333 | 10.57222 | 8.322727 | 11.12    | 10.15818 |
|         |   |          |          | 667      | 364      | 364      | 273      | 778      | 778      | 636      | 818      |          | 333      | 222      | 273      |          | 182      |
| CD99L2  | M | 34.177   | 32.432   | 35.42777 | 35.23    | 31.00090 | 32.45545 | 34.15333 | 33.70444 | 44.52909 | 32.60818 | 35.005   | 35.32888 | 35.44777 | 34.09090 | 34.876   | 35.38272 |
|         |   |          |          | 778      |          | 909      | 455      | 333      | 444      | 091      | 182      |          | 889      | 778      | 909      |          | 727      |
| CDK16   | M | 84.724   | 78.896   | 106.1922 | 93.35909 | 78.17272 | 72.59545 | 87.28666 | 81.83666 | 88.22272 | 77.67    | 84.906   | 80.76888 | 104.6477 | 81.08363 | 85.29    | 91.55909 |
|         |   |          |          | 222      | 091      | 727      | 455      | 667      | 667      | 727      |          |          | 889      | 778      | 636      |          | 091      |

|         |   |        |        |           |          |          |          |           |           |          |          |        |           |          |          |        |          |
|---------|---|--------|--------|-----------|----------|----------|----------|-----------|-----------|----------|----------|--------|-----------|----------|----------|--------|----------|
| CENPE   | M | 0.274  | 1.553  | 0.927777  | 0.411818 | 1.224545 | 0.297272 | 0.195555  | 0.525555  | 0.634545 | 0.414545 | 0.499  | 0.1811111 | 0.346666 | 1.045454 | 0.59   | 0.355454 |
|         |   |        |        | 778       | 182      | 455      | 727      | 556       | 556       | 455      | 455      |        | 11        | 667      | 545      |        | 545      |
| CFAP69  | M | #N/A   | #N/A   | #N/A      | #N/A     | #N/A     | #N/A     | #N/A      | #N/A      | #N/A     | #N/A     | #N/A   | #N/A      | #N/A     | #N/A     | #N/A   | #N/A     |
| CLCN6   | M | 11.551 | 9.791  | 10.36222  | 11.23909 | 9.242727 | 9.599090 | 9.203333  | 10.75555  | 11.73181 | 10.62909 | 10.915 | 9.928888  | 11.09333 | 7.767272 | 10.349 | 11.39363 |
|         |   |        |        | 222       | 091      | 273      | 909      | 333       | 556       | 818      | 091      |        | 889       | 333      | 727      |        | 636      |
| COL4A5  | M | 1.254  | 3.857  | 2.375555  | 1.678181 | 7.353636 | 1.352727 | 1.245555  | 2.047777  | 1.504545 | 2.579090 | 2.302  | 2.015555  | 1.454444 | 1.904545 | 2.317  | 1.776363 |
|         |   |        |        | 556       | 818      | 364      | 273      | 556       | 778       | 455      | 909      |        | 556       | 444      | 455      |        | 636      |
| CXorf36 | M | 1.594  | 2.359  | 2.3711111 | 2.637272 | 2.462727 | 2.061818 | 2.39      | 3.14      | 2.492727 | 2.797272 | 2.677  | 2.657777  | 1.536666 | 2.942727 | 1.654  | 2.384545 |
|         |   |        |        | 11        | 727      | 273      | 182      |           |           | 273      | 727      |        | 778       | 667      | 273      |        | 455      |
| CYFIP1  | M | 17.891 | 23.321 | 20.99444  | 17.72181 | 19.95454 | 16.43363 | 16.97222  | 13.68444  | 13.43363 | 14.94454 | 15.244 | 17.86555  | 18.47222 | 12.96454 | 18.301 | 17.87    |
|         |   |        |        | 444       | 818      | 545      | 636      | 222       | 444       | 636      | 545      |        | 556       | 222      | 545      |        |          |
| DZANK1  | M | 2.956  | 2.78   | 2.6911111 | 3.222727 | 3.199090 | 2.409090 | 3.177777  | 2.39      | 3.319090 | 3.008181 | 2.762  | 3.0311111 | 3.026666 | 3.132727 | 2.802  | 3.158181 |
|         |   |        |        | 11        | 273      | 909      | 909      | 778       |           | 909      | 818      |        | 11        | 667      | 273      |        | 818      |
| EGR3    | M | 9.052  | 6.314  | 0.2211111 | 7.52     | 3.199090 | 7.860909 | 9.242222  | 8.9511111 | 1.403636 | 4.740909 | 7.079  | 9.136666  | 10.26888 | 9.056363 | 7.018  | 6.49     |
|         |   |        |        | 11        |          | 909      | 091      | 222       | 11        | 364      | 091      |        | 667       | 889      | 636      |        |          |
| FBXO39  | M | 0.011  | 0.075  | 0.086666  | 0.014545 | 0.098181 | 0.015454 | 0.037777  | 0.015555  | 0.058181 | 0.03     | 0.066  | 0.018888  | 0.016666 | 0.059090 | 0.021  | 0.025454 |
|         |   |        |        | 667       | 455      | 818      | 545      | 778       | 556       | 818      |          |        | 889       | 667      | 909      |        | 545      |
| FRMPD3  | M | 1.267  | 1.687  | 4.278888  | 1.985454 | 1.754545 | 1.3      | 1.133333  | 2.043333  | 0.738181 | 1.714545 | 1.707  | 1.857777  | 1.437777 | 0.919090 | 1.832  | 1.745454 |
|         |   |        |        | 889       | 545      | 455      |          | 333       | 333       | 818      | 455      |        | 778       | 778      | 909      |        | 545      |
| GNL3L   | M | 2.247  | 2.326  | 2.688888  | 2.165454 | 2.472727 | 1.954545 | 1.557777  | 1.794444  | 2.322727 | 2.209090 | 2.022  | 2.082222  | 2.577777 | 2.112727 | 2.709  | 2.207272 |
|         |   |        |        | 889       | 545      | 273      | 455      | 778       | 444       |          | 273      | 909    | 222       | 778      | 273      |        | 727      |
| GOLGA5  | M | 11.69  | 9.084  | 10.27555  | 10.19363 | 9.271818 | 10.67454 | 8.972222  | 11.43333  | 8.821818 | 9.929090 | 10.885 | 10.44     | 9.522222 | 8.18     | 10.724 | 9.908181 |
|         |   |        |        | 556       | 636      | 182      | 545      | 222       | 333       | 182      | 909      |        |           | 222      |          |        | 818      |
| GPR119  | M | 0      | 0      | 0.02      | 0        | 0        | 0        | 0         | 0.016666  | 0.002727 | 0        | 0.015  | 0         | 0        | 0        | 0      | 0        |
|         |   |        |        |           |          |          |          |           | 667       | 273      |          |        |           |          |          |        |          |
| GPRASP1 | M | 11.051 | 10.38  | 17.13111  | 9.891818 | 10.01090 | 9.504545 | 9.7411111 | 8.447777  | 15.71454 | 10.81545 | 9.903  | 9.045555  | 11.48777 | 12.94545 | 10.009 | 10.72181 |
|         |   |        |        | 111       | 182      | 909      | 455      | 11        | 778       | 545      | 455      |        | 556       | 778      | 455      |        | 818      |
| GPT2    | M | 15.237 | 25.922 | 16.71555  | 16.26181 | 24.45090 | 14.21    | 15.81333  | 13.92333  | 15.83545 | 15.71181 | 14.758 | 12.68666  | 17.86666 | 18.89090 | 14.71  | 16.47    |
|         |   |        |        | 556       | 818      | 909      |          | 333       | 333       | 455      | 818      |        | 667       | 667      | 909      |        |          |
| HMCN1   | M | 0.416  | 0.347  | 1.253333  | 0.829090 | 2.121818 | 0.251818 | 0.347777  | 0.833333  | 0.993636 | 0.550909 | 0.746  | 0.472222  | 0.426666 | 0.604545 | 0.517  | 0.477272 |
|         |   |        |        | 333       | 909      | 182      | 182      | 778       | 333       | 364      | 091      |        | 222       | 667      | 455      |        | 727      |
| HUWE1   | M | 32.61  | 30.199 | 35.42666  | 32.58545 | 28.87909 | 27.59090 | 27.65777  | 31.72555  | 25.52    | 31.99454 | 30.508 | 30.47111  | 34.08555 | 26.53545 | 37.302 | 31.97454 |
|         |   |        |        | 667       | 455      | 091      | 909      | 778       | 556       |          | 545      |        | 111       | 556      | 455      |        | 545      |

|         |   |        |        |           |          |          |          |           |           |          |          |        |          |          |          |        |          |
|---------|---|--------|--------|-----------|----------|----------|----------|-----------|-----------|----------|----------|--------|----------|----------|----------|--------|----------|
| ITM2A   | M | 47.782 | 85.339 | 69.94888  | 77.14090 | 79.95909 | 73.5     | 78.011111 | 86.91777  | 84.62090 | 86.73636 | 89.729 | 96.19111 | 54.28    | 99.22909 | 53.532 | 81.84636 |
|         |   |        |        | 889       | 909      | 091      |          | 11        | 778       | 909      | 364      |        | 111      |          | 091      |        | 364      |
| LHFPL1  | M | 0.098  | 0.257  | 0.166666  | 0.093636 | 0.162727 | 0.164545 | 0.12      | 0.145555  | 0.545454 | 0.154545 | 0.169  | 0.085555 | 0.148888 | 0.302727 | 0.101  | 0.071818 |
|         |   |        |        | 667       | 364      | 273      | 455      |           | 556       | 545      | 455      |        | 556      | 889      | 273      |        | 182      |
| MACF1   | M | 61.037 | 57.27  | 66.62666  | 71.15090 | 51.48181 | 56.60636 | 47.30888  | 58.74444  | 54.44727 | 68.69909 | 67.756 | 59.00666 | 62.26444 | 54.39454 | 62.171 | 70.49545 |
|         |   |        |        | 667       | 909      | 818      | 364      | 889       | 444       | 273      | 091      |        | 667      | 444      | 545      |        | 455      |
| MAOB    | M | 3.645  | 7.732  | 3.006666  | 3.93     | 9.019090 | 3.51     | 4.207777  | 4.135555  | 9.377272 | 5.774545 | 4.599  | 4.01     | 4.173333 | 7.416363 | 2.872  | 4.401818 |
|         |   |        |        | 667       |          | 909      |          | 778       | 556       | 727      | 455      |        |          | 333      | 636      |        | 182      |
| MAP3K15 | M | 0.315  | 0.278  | 0.4311111 | 0.275454 | 0.309090 | 0.290909 | 0.2411111 | 0.203333  | 0.2      | 0.391818 | 0.376  | 0.237777 | 0.327777 | 0.322727 | 0.274  | 0.31     |
|         |   |        |        | 11        | 545      | 909      | 091      | 11        | 333       |          | 182      |        | 778      | 778      | 273      |        |          |
| MAP7D3  | M | 0.316  | 1.086  | 1.702222  | 0.374545 | 1.321818 | 0.29     | 0.404444  | 0.4611111 | 1.058181 | 0.408181 | 0.379  | 0.298888 | 0.387777 | 1.884545 | 0.522  | 0.337272 |
|         |   |        |        | 222       | 455      | 182      |          | 444       | 11        | 818      | 818      |        | 889      | 778      | 455      |        | 727      |
| ME3     | M | 16.434 | 11.397 | 15.20777  | 20.55    | 13.76545 | 14.89272 | 15.18222  | 15.39555  | 22.18090 | 18.45545 | 17.856 | 15.34666 | 18.80777 | 19.14454 | 14.51  | 21.24909 |
|         |   |        |        | 778       |          | 455      | 727      | 222       | 556       | 909      | 455      |        | 667      | 778      | 545      |        | 091      |
| MRPL17  | M | 13.339 | 18.547 | 18.75555  | 13.47545 | 19.65090 | 12.92272 | 14.96777  | 12.01666  | 17.40818 | 13.59818 | 13.796 | 13.16555 | 16.42777 | 18.50818 | 15.801 | 14.38181 |
|         |   |        |        | 556       | 455      | 909      | 727      | 778       | 667       | 182      | 182      |        | 556      | 778      | 182      |        | 818      |
| MSL3    | M | 18.226 | 13.181 | 14.59666  | 17.27545 | 14.69090 | 17.72363 | 13.42555  | 13.39     | 17.06363 | 16.55272 | 16.366 | 15.48111 | 15.53666 | 15.79909 | 14.668 | 17.23727 |
|         |   |        |        | 667       | 455      | 909      | 636      | 556       |           | 636      | 727      |        | 111      | 667      | 091      |        | 273      |
| MYO18A  | M | 29.192 | 23.2   | 23.47555  | 30.46818 | 22.24818 | 25.64090 | 26.51777  | 26.32222  | 28.73818 | 25.99090 | 26.634 | 28.92    | 33.94888 | 22.94909 | 29.445 | 27.76    |
|         |   |        |        | 556       | 182      | 182      | 909      | 778       | 222       | 182      | 909      |        |          | 889      | 091      |        |          |
| NOS3    | M | 2.095  | 2.597  | 2.303333  | 3.229090 | 2.861818 | 3.731818 | 3.4211111 | 4.678888  | 3.419090 | 3.437272 | 3.171  | 4.746666 | 2.193333 | 2.962727 | 1.973  | 3.227272 |
|         |   |        |        | 333       | 909      | 182      | 182      | 11        | 889       | 909      | 727      |        | 667      | 333      | 273      |        | 727      |
| OR8D2   | M | 0      | 0      | 0         | 0        | 0        | 0        | 0         | 0.004444  | 0        | 0        | 0      | 0        | 0        | 0        | 0      | 0        |
|         |   |        |        |           |          |          |          |           | 444       |          |          |        |          |          |          |        |          |
| ORC3    | M | 11.587 | 11.441 | 14.63222  | 8.513636 | 12.52545 | 10.41909 | 10.92333  | 7.875555  | 11.62    | 9.221818 | 9.549  | 8.745555 | 9.792222 | 10.83545 | 9.578  | 9.264545 |
|         |   |        |        | 222       | 364      | 455      | 091      | 333       | 556       |          | 182      |        | 556      | 222      | 455      |        | 455      |
| PARS2   | M | 1.312  | 1.794  | 2.027777  | 1.406363 | 1.665454 | 1.243636 | 1.392222  | 1.2211111 | 1.357272 | 1.605454 | 1.376  | 1.287777 | 1.334444 | 1.773636 | 1.472  | 1.38     |
|         |   |        |        | 778       | 636      | 545      | 364      | 222       | 11        | 727      | 545      |        | 778      | 444      | 364      |        |          |
| PFKFB4  | M | 5.997  | 5.002  | 6.097777  | 6.410909 | 5.534545 | 6.247272 | 5.336666  | 5.702222  | 6.39     | 6.097272 | 5.8    | 6.01     | 6.327777 | 4.869090 | 6.478  | 6.645454 |
|         |   |        |        | 778       | 091      | 455      | 727      | 667       | 222       |          | 727      |        |          | 778      | 909      |        | 545      |
| PHKA1   | M | 0.674  | 1.441  | 0.84      | 0.734545 | 1.267272 | 0.621818 | 0.732222  | 0.733333  | 1.367272 | 0.749090 | 0.704  | 0.732222 | 0.716666 | 1.41     | 0.795  | 0.693636 |
|         |   |        |        |           | 455      | 727      | 182      | 222       | 333       | 727      | 909      |        | 222      | 667      |          |        | 364      |
| PLEKHG2 | M | 15.299 | 16.543 | 11.72     | 18.23    | 14.44454 | 12.55    | 13.05     | 12.92444  | 8.947272 | 14.36909 | 16.406 | 14.00555 | 17.13    | 15.56090 | 19.246 | 15.07545 |

|          |   |        |        |          |          |          |          |           |           |          |          |        |           |          |          |        |          |
|----------|---|--------|--------|----------|----------|----------|----------|-----------|-----------|----------|----------|--------|-----------|----------|----------|--------|----------|
|          |   |        |        |          |          | 545      |          |           | 444       | 727      | 091      |        | 556       |          | 909      |        | 455      |
| PNMA3    | M | 7.045  | 5.547  | 6.123333 | 7.101818 | 5.552727 | 5.637272 | 6.6211111 | 5.34      | 6.178181 | 6.126363 | 6.165  | 6.234444  | 8.068888 | 5.85     | 6.53   | 6.593636 |
|          |   |        |        | 333      | 182      | 273      | 727      | 11        |           | 818      | 636      |        | 444       | 889      |          |        | 364      |
| PNPLA4   | M | 5.967  | 5.598  | 7.482222 | 6.085454 | 8.687272 | 6.263636 | 6.505555  | 5.31      | 7.809090 | 5.758181 | 6.016  | 5.274444  | 6.116666 | 7.637272 | 6.633  | 5.738181 |
|          |   |        |        | 222      | 545      | 727      | 364      | 556       |           | 909      | 818      |        | 444       | 667      | 727      |        | 818      |
| PRICKLE3 | M | 0.289  | 0.397  | 0.708888 | 0.336363 | 0.420909 | 0.351818 | 0.368888  | 0.4711111 | 0.361818 | 0.347272 | 0.383  | 0.528888  | 0.28     | 0.458181 | 0.348  | 0.434545 |
|          |   |        |        | 889      | 636      | 091      | 182      | 889       | 11        | 182      | 727      |        | 889       |          | 818      |        | 455      |
| REPS2    | M | 4.317  | 4.581  | 4.368888 | 3.967272 | 2.914545 | 3.537272 | 3.905555  | 3.953333  | 3.200909 | 3.63     | 3.664  | 4.353333  | 4.58     | 3.131818 | 3.945  | 4.11     |
|          |   |        |        | 889      | 727      | 455      | 727      | 556       | 333       | 091      |          |        | 333       |          | 182      |        |          |
| RPGR     | M | 1.407  | 1.962  | 2.102222 | 1.394545 | 4.015454 | 1.221818 | 1.056666  | 0.98      | 3.384545 | 1.436363 | 1.174  | 1.416666  | 1.203333 | 2.024545 | 1.688  | 1.087272 |
|          |   |        |        | 222      | 455      | 545      | 182      | 667       |           | 455      | 636      |        | 667       | 333      | 455      |        | 727      |
| RYR2     | M | 11.042 | 5.446  | 7.957777 | 5.151818 | 4.030909 | 6.669090 | 7.778888  | 5.105555  | 1.728181 | 4.774545 | 6.402  | 7.48      | 10.61222 | 8.235454 | 10.566 | 5.868181 |
|          |   |        |        | 778      | 182      | 091      | 909      | 889       | 556       | 818      | 455      |        |           | 222      | 545      |        | 818      |
| SH3KBP1  | M | 16.608 | 12.007 | 11.29777 | 14.85272 | 18.90545 | 15.60727 | 13.88888  | 11.95444  | 22.16818 | 14.70363 | 14.015 | 14.17444  | 20.34111 | 17.38545 | 16.307 | 14.06636 |
|          |   |        |        | 778      | 727      | 455      | 273      | 889       | 444       | 182      | 636      |        | 444       | 111      | 455      |        | 364      |
| SHROOM2  | M | 7.418  | 8.82   | 9.892222 | 7.047272 | 4.395454 | 5.334545 | 6.764444  | 6.1311111 | 13.32545 | 5.224545 | 6.862  | 5.934444  | 6.642222 | 8.559090 | 4.243  | 8.13     |
|          |   |        |        | 222      | 727      | 545      | 455      | 444       | 11        | 455      | 455      |        | 444       | 222      | 909      |        |          |
| SIPA1L3  | M | 7.13   | 5.992  | 11.06777 | 6.340909 | 6.609090 | 5.497272 | 4.853333  | 6.985555  | 5.384545 | 5.099090 | 6      | 5.4611111 | 7        | 5.766363 | 7.305  | 5.824545 |
|          |   |        |        | 778      | 091      | 909      | 727      | 333       | 556       | 455      | 909      |        | 11        |          | 636      |        | 455      |
| SLC37A1  | M | 8.521  | 7.072  | 9.792222 | 10.85090 | 6.817272 | 7.61     | 7.475555  | 8.436666  | 14.91454 | 11.59181 | 9.916  | 8.233333  | 9.356666 | 9.804545 | 6.817  | 10.66272 |
|          |   |        |        | 222      | 909      | 727      |          | 556       | 667       | 545      | 818      |        | 333       | 667      | 455      |        | 727      |
| TAF1     | M | 5.558  | 6.117  | 7.385555 | 6.201818 | 5.558181 | 5.332727 | 5.447777  | 5.518888  | 4.293636 | 5.813636 | 6.526  | 5.733333  | 6.676666 | 4.811818 | 7.616  | 6.26     |
|          |   |        |        | 556      | 182      | 818      | 273      | 778       | 889       | 364      | 364      |        | 333       | 667      | 182      |        |          |
| TAF7L    | M | 0.145  | 0.182  | 0.085555 | 0.203636 | 0.205454 | 0.18     | 0.2011111 | 0.144444  | 0.068181 | 0.14     | 0.153  | 0.157777  | 0.205555 | 0.097272 | 0.082  | 0.212727 |
|          |   |        |        | 556      | 364      | 545      |          | 11        | 444       | 818      |          |        | 778       | 556      | 727      |        | 273      |
| TDRD6    | M | 0.243  | 0.251  | 0.784444 | 0.238181 | 0.359090 | 0.165454 | 0.275555  | 0.213333  | 0.26     | 0.327272 | 0.201  | 0.246666  | 0.233333 | 0.215454 | 0.204  | 0.363636 |
|          |   |        |        | 444      | 818      | 909      | 545      | 556       | 333       |          | 727      |        | 667       | 333      | 545      |        | 364      |
| TECTA    | M | 0.871  | 0.676  | 0.674444 | 1.065454 | 0.667272 | 0.792727 | 0.588888  | 1.198888  | 0.508181 | 1.015454 | 0.957  | 1.066666  | 0.825555 | 0.79     | 1.163  | 1.005454 |
|          |   |        |        | 444      | 545      | 727      | 273      | 889       | 889       | 818      | 545      |        | 667       | 556      |          |        | 545      |
| TGM3     | M | 0.062  | 0.22   | 0.207777 | 0.047272 | 0.250909 | 0.026363 | 0.0511111 | 0.033333  | 0.169090 | 0.06     | 0.026  | 0.023333  | 0.036666 | 0.139090 | 0.047  | 0.036363 |
|          |   |        |        | 778      | 727      | 091      | 636      | 11        | 333       | 909      |          |        | 333       | 667      | 909      |        | 636      |
| TPCN1    | M | 3.674  | 4.6    | 12.35333 | 4.162727 | 4.754545 | 3.819090 | 4.19      | 4.076666  | 4.9      | 3.521818 | 3.891  | 4.546666  | 4.184444 | 4.368181 | 3.954  | 3.96     |
|          |   |        |        | 333      | 273      | 455      | 909      |           | 667       |          | 182      |        | 667       | 444      | 818      |        |          |

|         |   |         |         |           |          |          |          |           |          |          |          |         |           |           |          |         |          |
|---------|---|---------|---------|-----------|----------|----------|----------|-----------|----------|----------|----------|---------|-----------|-----------|----------|---------|----------|
| UBA1    | M | 121.901 | 119.033 | 128.1433  | 130.42   | 114.45   | 110.4854 | 108.1211  | 114.6211 | 126.6790 | 123.0554 | 118.956 | 113.7944  | 129.3288  | 111.7972 | 123.006 | 130.0136 |
|         |   |         |         | 333       |          |          | 545      | 111       | 111      | 909      | 545      |         | 444       | 889       | 727      |         | 364      |
| ULK4    | M | 0.917   | 0.855   | 1.187777  | 1.145454 | 1.725454 | 1.143636 | 0.748888  | 1.098888 | 1.12     | 1.537272 | 1.555   | 1.298888  | 0.912222  | 1.24     | 1.095   | 1.294545 |
|         |   |         |         | 778       | 545      | 545      | 364      | 889       | 889      |          | 727      |         | 889       | 222       |          |         | 455      |
| USP51   | M | 1.339   | 1.047   | 1.1411111 | 1.131818 | 1.28     | 1.293636 | 1.237777  | 1.004444 | 1.117272 | 1.039090 | 1.094   | 1.023333  | 1.27      | 1.059090 | 1.098   | 1.077272 |
|         |   |         |         | 11        | 182      |          | 364      | 778       | 444      | 727      | 909      |         | 333       |           | 909      |         | 727      |
| UTP6    | M | 21.329  | 20.39   | 27.30111  | 21.54545 | 20.85727 | 20.83090 | 20.46222  | 15.36666 | 17.54545 | 21.47272 | 22.377  | 20.31333  | 20.56444  | 18.08272 | 24.304  | 22.82454 |
|         |   |         |         | 111       | 455      | 273      | 909      | 222       | 667      | 455      | 727      |         | 333       | 444       | 727      |         | 545      |
| WDFY4   | M | 0.48    | 0.364   | 0.834444  | 0.52     | 0.663636 | 0.287272 | 0.368888  | 0.377777 | 0.469090 | 0.361818 | 0.534   | 0.3911111 | 0.43      | 0.428181 | 0.655   | 0.345454 |
|         |   |         |         | 444       |          | 364      | 727      | 889       | 778      | 909      | 182      |         | 11        |           | 818      |         | 545      |
| ZCCHC16 | M | 0.023   | 0.011   | 0.0411111 | 0.032727 | 0.039090 | 0.046363 | 0.0111111 | 0.038888 | 0.022727 | 0.031818 | 0.019   | 0.042222  | 0.023333  | 0.036363 | 0.003   | 0.035454 |
|         |   |         |         | 11        | 273      | 909      | 636      | 11        | 889      | 273      | 182      |         | 222       | 333       | 636      |         | 545      |
| ZRSR2   | M | 6.534   | 6.882   | 8.182222  | 6.935454 | 6.225454 | 6.245454 | 6.354444  | 4.403333 | 6.138181 | 6.19     | 6.539   | 5.066666  | 6.8711111 | 7.341818 | 6.981   | 6.268181 |
|         |   |         |         | 222       | 545      | 545      | 545      | 444       | 333      | 818      |          |         | 667       | 11        | 182      |         | 818      |

Supplementary Table S4 Comprehensive list of candidate variants

| Gene            | Family ID | Inheritance pattern | Inherited from | Variant type | Cytoband | POS           | REF | ALT | Variants description                                                                | Frequency in gnomAD East Asian | CADD  | RVIS                  | Expression in brain | Co-expression with EIEE genes | Physical interactions with EIEE protein | Additional command |
|-----------------|-----------|---------------------|----------------|--------------|----------|---------------|-----|-----|-------------------------------------------------------------------------------------|--------------------------------|-------|-----------------------|---------------------|-------------------------------|-----------------------------------------|--------------------|
| <i>ABCA7</i>    | WS8       | AR                  | F              | missense SNV | 19p13.3  | 1052006       | G   | A   | ABCA7:NM_019112:exon22:c.G3028A:p.V1010M                                            | 0                              |       | 3.5151<br>(99.4037%)  | +                   | +                             | -                                       |                    |
| <i>ABCA7</i>    | WS8       | AR                  | M              | missense SNV | 19p13.3  | 1043371       | C   | T   | ABCA7:NM_019112:exon9:c.C829T:p.H277Y                                               | NA                             | 15.96 |                       | +                   | +                             | -                                       |                    |
| <i>ACE2</i>     | WS27      | XL                  | M              | missense SNV | Xp22.2   | 15588434      | G   | A   | ACE2:NM_021804:exon15:c.C1880T:p.A627V                                              | 0.0001556<br>78                | 19.94 | 0.1121<br>(57.6803%)  | -                   | -                             | -                                       |                    |
| <i>ADGRG4</i>   | WS51      | XL                  | M              | nonsense     | Xq26.3   | 13544367<br>2 | G   | A   | ADGRG4:NM_153834:exon12:c.G7203A:p.(Trp2401*)                                       | NA                             | 50    | 2.6901<br>(98.9028%)  | -                   | -                             | -                                       |                    |
| <i>ALG3</i>     | WS53      | AD                  | de novo        | missense SNV | 3q27.1   | 18396069<br>4 | C   | T   | ALG3:NM_001006941:exon8:c.G917A:p.R306H,ALG3:NM_005787:exon8:c.G1061A:p.R354H       | 0                              | 28.7  | -0.2495<br>(37.9472%) | +                   | -                             | -                                       |                    |
| <i>ARHGAP17</i> | WS3       | AD                  | de novo        | missense SNV | 16p12.1  | 24975556      | C   | T   | ARHGAP17:NM_01006634:exon7:c.G535A:p.E179K,ARHGAP17:NM_018054:exon7:c.G535A:p.E179K | NA                             | 34    | -0.5951<br>(24.1935%) | +                   | -                             | +                                       |                    |
| <i>ARSF</i>     | WS39      | XL                  | M              | missense SNV | Xp22.33  | 3007644       | A   | T   | ARSF:NM_001201538:exon7:c.A938T:p.D313V,ARSF:NM_001                                 | 0.0003886<br>51                | 12.13 | 1.3132<br>(92.7900%)  | +                   | -                             | -                                       |                    |

|                 |      |    |         |                        |          |               |    |   |                                                                                                                                                                                    |                 |       |                       |   |   |   |                                       |
|-----------------|------|----|---------|------------------------|----------|---------------|----|---|------------------------------------------------------------------------------------------------------------------------------------------------------------------------------------|-----------------|-------|-----------------------|---|---|---|---------------------------------------|
| <i>ATP2A2</i>   | WS16 | AD | de novo | missense<br>SNV        | 12q24.11 | 11078274<br>7 | G  | A | 201539:exon7:c.A93<br>8T:p.D313V,ARSF:N<br>M_004042:exon7:c.A<br>938T:p.D313V<br>ATP2A2:NM_001681<br>:exon17:c.G2578A:p.<br>G860S,ATP2A2:NM<br>_170665:exon17:c.G<br>2578A:p.G860S | NA              | 22.4  | -1.9026<br>(3.4897%)  | + | - | - | Calcium<br>signaling<br>pathway, FMRP |
| <i>AWAT1</i>    | WS51 | XL | M       | missense<br>SNV        | Xq13.1   | 69459740      | G  | T | AWAT1:NM_001013<br>579:exon6:c.G788T:p<br>.G263V                                                                                                                                   | NA              |       | -0.3850<br>(28.5266%) | - | - | - |                                       |
| <i>C9orf163</i> | WS37 | AR | F&M     | missense<br>SNV        | 9q34.3   | 13937892<br>6 | C  | A | C9orf163:NM_15257<br>1:exon1:c.C26A:p.P9<br>H                                                                                                                                      | 0.0006165<br>23 |       | NA (NA)               | - | - | - |                                       |
| <i>CASD1</i>    | WS10 | AD | de novo | missense<br>SNV        | 7q21.3   | 94163011      | T  | G | CASD1:NM_022900:<br>exon7:c.T525G:p.N1<br>75K                                                                                                                                      | NA              | 16.08 | -0.2126<br>(39.5699%) | + | - | - |                                       |
| <i>CAT</i>      | WS32 | AR | F       | frameshift<br>deletion | 11p13    | 34470807      | GC | G | CAT:NM_001752:ex<br>on2:c.139del:p.Arg47<br>Valfs*88                                                                                                                               | 0.0000579<br>77 |       | -0.2426<br>(38.2209%) | + | - | - |                                       |
| <i>CAT</i>      | WS32 | AR | M       | splicing               | 11p13    | 34473759      | G  | A | NM_001752:exon4:c.<br>480+5G>A                                                                                                                                                     | 0.0002319<br>11 | 14.89 |                       | + | - | - |                                       |
| <i>CCDC120</i>  | WS36 | XL | M       | missense<br>SNV        | Xp11.23  | 48919807      | G  | C | CCDC120:NM_0011<br>63321:exon3:c.G105<br>C:p.K35N                                                                                                                                  | NA              | 16.45 | 0.6576<br>(81.8182%)  | + | + | - |                                       |
| <i>CCDC14</i>   | WS14 | AD | de novo | missense<br>SNV        | 3q21.1   | 12366568<br>9 | A  | G | CCDC14:NM_00130<br>8317:exon7:c.T706C:<br>p.Y236H,CCDC14:N<br>M_022757:exon7:c.T<br>1183C:p.Y395H                                                                                  | NA              | 21.7  | 0.1377<br>(56.1877%)  | + | - | - |                                       |
| <i>CCPG1</i>    | WS17 | AD | de novo | missense<br>SNV        | 15q21.3  | 55652698      | C  | G | CCPG1:NM_001204<br>450:exon8:c.G1273C:                                                                                                                                             | NA              |       | -0.3939<br>(31.7595%) | + | - | - |                                       |

| Gene          | Sample | Cell Line | Sex | Variant Type     | Position | Ref      | Alt | Quality | Gene                                                                                                                                                                                                                                              | Transcript       | AF        | Depth | AD         | AC | Phase | Notes |                   |  |
|---------------|--------|-----------|-----|------------------|----------|----------|-----|---------|---------------------------------------------------------------------------------------------------------------------------------------------------------------------------------------------------------------------------------------------------|------------------|-----------|-------|------------|----|-------|-------|-------------------|--|
| <i>CD99L2</i> | WS25   | XL        | M   | inframe deletion | Xq28     | 14993752 | GGG | G       | p.A425P,CCPG1:NM_004748:exon8:c.G1273C:p.A425P                                                                                                                                                                                                    | CD99L2:NM_001184 | 0.0009596 | 7.491 | 0.8208     | +  | -     | +     | Recurrent variant |  |
|               |        |           |     |                  |          | 5        | C   |         | 808:exon8:c.549_551del:p.(Pro184del),CD99L2:NM_134445:exon8:c.552_554del:p.(Pro185del),CD99L2:NM_134446:exon9:c.621_623del:p.(Pro208del),CD99L2:NM_031462:exon11:c.768_770del:p.(Pro257del),CD99L2:NM_001242614:exon12:c.798_800del:p.(Pro267del) |                  | 93        |       | (85.4232%) |    |       |       |                   |  |
| <i>CD99L2</i> | WS2    | XL        | M   | inframe deletion | Xq28     | 14993752 | GGG | G       | p.A425P,CCPG1:NM_004748:exon8:c.G1273C:p.A425P                                                                                                                                                                                                    | CD99L2:NM_001184 | 0.0009596 | 7.491 |            | +  | -     | +     | Recurrent variant |  |
|               |        |           |     |                  |          | 5        | C   |         | 808:exon8:c.549_551del:p.(Pro184del),CD99L2:NM_134445:exon8:c.552_554del:p.(Pro185del),CD99L2:NM_134446:exon9:c.621_623del:p.(Pro208del),CD99L2:NM_031462:exon11:c.768_770del:p.(Pro257del),CD99L2:NM_001242614:exon12:c.798_800del:p.(Pro267del) |                  | 93        |       |            |    |       |       |                   |  |



|               |      |    |         |                 |         |               |   |   |                                                                                                                                         |                 |       |                       |   |   |   |                  |
|---------------|------|----|---------|-----------------|---------|---------------|---|---|-----------------------------------------------------------------------------------------------------------------------------------------|-----------------|-------|-----------------------|---|---|---|------------------|
| <i>CDK16</i>  | WS48 | XL | M       | missense<br>SNV | Xp11.23 | 47082993      | A | G | CDK16:NM_001170<br>460:exon2:c.A259G:<br>p.M87V,CDK16:NM<br>_006201:exon2:c.A3<br>7G:p.M13V,CDK16:<br>NM_033018:exon2:c.<br>A55G:p.M19V | 0               | 12.82 | -0.4803<br>(24.7649%) | + | + | - | FMRP             |
| <i>CENPE</i>  | WS16 | AR | M       | missense<br>SNV | 4q24    | 10409819<br>9 | T | C | CENPE:NM_001286<br>734:exon14:c.A1247<br>G:p.K416R,CENPE:<br>NM_001813:exon14:<br>c.A1247G:p.K416R                                      | NA              | 16.93 | -0.2468<br>(38.0352%) | - | - | + |                  |
| <i>CENPE</i>  | WS16 | AR | F       | missense<br>SNV | 4q24    | 10403210<br>6 | C | T | CENPE:NM_001286<br>734:exon45:c.G7240<br>A:p.G2414S,CENPE:<br>NM_001813:exon47:<br>c.G7603A:p.G2535S                                    | 0               | 18.45 |                       | - | - | + |                  |
| <i>CES4A</i>  | WS10 | AD | de novo | missense<br>SNV | 16q22.1 | 67029560      | G | A | CES4A:NM_173815:<br>exon2:c.G88A:p.V30<br>I                                                                                             | 0               |       | 0.2551<br>(61.4858%)  | + | + | - |                  |
| <i>CFAP69</i> | WS14 | AR | M       | missense<br>SNV | 7q21.13 | 89909205      | A | C | CFAP69:NM_001039<br>706:exon12:c.A1370<br>C:p.E457A,CFAP69:<br>NM_001160138:exon<br>12:c.A1316C:p.E439<br>A                             | 6.23752E-<br>05 | 18.08 | 0.3879<br>(67.1848%)  | - | - | - |                  |
| <i>CFAP69</i> | WS14 | AR | F       | missense<br>SNV | 7q21.13 | 89917639      | T | C | CFAP69:NM_001039<br>706:exon15:c.T1748<br>C:p.L583P,CFAP69:<br>NM_001160138:exon<br>15:c.T1694C:p.L565<br>P                             | 0.0001159<br>82 | 15.5  |                       | - | - | - |                  |
| <i>CLCN6</i>  | WS22 | AD | de novo | missense        | 1p36.22 | 11884561      | A | C | CLCN6:NM_001256                                                                                                                         | NA              | 17.32 | -1.5930               | + | - | - | Chloride channel |

|                |      |    |         |          |          |          |     |   |                      |           |       |           |   |   |   |      |
|----------------|------|----|---------|----------|----------|----------|-----|---|----------------------|-----------|-------|-----------|---|---|---|------|
|                |      |    |         | SNV      |          |          |     |   | 959:exon7:c.A533C:p  |           |       | (5.3763%) |   |   |   |      |
|                |      |    |         |          |          |          |     |   | .E178A,CLCN6:NM_     |           |       |           |   |   |   |      |
|                |      |    |         |          |          |          |     |   | 001286:exon8:c.A59   |           |       |           |   |   |   |      |
|                |      |    |         |          |          |          |     |   | 9C;p.E200A           |           |       |           |   |   |   |      |
| <i>COL4A5</i>  | WS11 | XL | M       | missense | Xq22.3   | 10786948 | A   | C | COL4A5:NM_00049      | 7.78756E- |       | 0.5065    | + | - | - |      |
|                |      |    |         | SNV      |          | 8        |     |   | 5:exon36:c.A3155C:p  | 05        |       | (76.0188% |   |   |   |      |
|                |      |    |         |          |          |          |     |   | .Q1052P              |           |       | )         |   |   |   |      |
| <i>COL9A2</i>  | WS42 | AR | F       | missense | 1p34.2   | 40775944 | C   | T | COL9A2:NM_00185      | NA        | 16.26 | 1.2519    | + | - | - |      |
|                |      |    |         | SNV      |          |          |     |   | 2:exon14:c.G730A:p.  |           |       | (90.7429% |   |   |   |      |
|                |      |    |         |          |          |          |     |   | G244R                |           |       | )         |   |   |   |      |
| <i>COL9A2</i>  | WS42 | AR | M       | missense | 1p34.2   | 40781333 | C   | T | COL9A2:NM_00185      | 0         | 24.1  |           | + | - | - |      |
|                |      |    |         | SNV      |          |          |     |   | 2:exon2:c.G79A:p.G2  |           |       |           |   |   |   |      |
|                |      |    |         |          |          |          |     |   | 7S                   |           |       |           |   |   |   |      |
| <i>CXorf36</i> | WS22 | XL | M       | missense | Xp11.3   | 45013424 | C   | A | CXorf36:NM_17681     | 0.0001644 | 19.38 | 0.8483    | + | - | - |      |
|                |      |    |         | SNV      |          |          |     |   | 9:exon4:c.G692T;p.G  | 6         |       | (86.2069% |   |   |   |      |
|                |      |    |         |          |          |          |     |   | 231V                 |           |       | )         |   |   |   |      |
| <i>CYFIP1</i>  | WS46 | AD | de novo | inframe  | 15q11.2  | 22939182 | AGG | A | CYFIP1:NM_014608     | NA        |       | -1.8425   | + | - | + | FMRP |
|                |      |    |         | deletion |          |          | T   |   | :exon10:c.909_911del |           |       | (3.7830%) |   |   |   |      |
|                |      |    |         |          |          |          |     |   | :p.303_304del,CYFIP  |           |       |           |   |   |   |      |
|                |      |    |         |          |          |          |     |   | 1:NM_001287810:ex    |           |       |           |   |   |   |      |
|                |      |    |         |          |          |          |     |   | on11:c.909_911del:p. |           |       |           |   |   |   |      |
|                |      |    |         |          |          |          |     |   | 303_304del           |           |       |           |   |   |   |      |
| <i>CYFIP2</i>  | WS1  | AD | de novo | missense | 5q33.3   | 15672184 | C   | T | CYFIP2:NM_001037     | NA        | 23.6  | -1.5154   | + | - | + | FMRP |
|                |      |    |         | SNV      |          | 3        |     |   | 333:exon4:c.C259T;p  |           |       | (5.9238%) |   |   |   |      |
|                |      |    |         |          |          |          |     |   | .R87C,CYFIP2:NM_     |           |       |           |   |   |   |      |
|                |      |    |         |          |          |          |     |   | 001291722:exon4:c.C  |           |       |           |   |   |   |      |
|                |      |    |         |          |          |          |     |   | 259T;p.R87C,CYFIP    |           |       |           |   |   |   |      |
|                |      |    |         |          |          |          |     |   | 2:NM_014376:exon4:   |           |       |           |   |   |   |      |
|                |      |    |         |          |          |          |     |   | c.C259T;p.R87C       |           |       |           |   |   |   |      |
| <i>DOCK2</i>   | WS21 | AD | de novo | missense | 5q35.1   | 16910878 | G   | A | DOCK2:NM_004946      | NA        | 27.7  | -0.9425   | - | - | - |      |
|                |      |    |         | SNV      |          | 5        |     |   | :exon7:c.G508A:p.G1  |           |       | (14.4868% |   |   |   |      |
|                |      |    |         |          |          |          |     |   | 70R                  |           |       | )         |   |   |   |      |
| <i>DZANK1</i>  | WS19 | AD | de novo | missense | 20p11.23 | 18424022 | C   | T | DZANK1:NM_00109      | NA        | 23.7  | 0.8412    | + | - | - | FMRP |

|               |      |    |         |                 |         |               |   |   |                                                                                                                       |    |       |           |   |   |   |                                  |
|---------------|------|----|---------|-----------------|---------|---------------|---|---|-----------------------------------------------------------------------------------------------------------------------|----|-------|-----------|---|---|---|----------------------------------|
|               |      |    |         | SNV             |         |               |   |   | 9407:exon8:c.G716A                                                                                                    |    |       | (82.7370% |   |   |   |                                  |
|               |      |    |         |                 |         |               |   |   | :p.G239D                                                                                                              |    |       | )         |   |   |   |                                  |
| <i>EGR3</i>   | WS15 | AD | de novo | missense<br>SNV | 8p21.3  | 22548111      | C | T | EGR3:NM_001199880:exon2:c.G925A;p.E309K,EGR3:NM_001199881:exon2:c.G877A;p.E293K,EGR3:NM_004430:exon2:c.G1039A;p.E347K | NA | 26.7  | -0.6773   | + | - | - |                                  |
|               |      |    |         |                 |         |               |   |   |                                                                                                                       |    |       | (21.6422% |   |   |   |                                  |
|               |      |    |         |                 |         |               |   |   |                                                                                                                       |    |       | )         |   |   |   |                                  |
| <i>FAT3</i>   | WS1  | AR | F       | missense<br>SNV | 11q14.3 | 92532823      | G | T | FAT3:NM_001008781:exon9:c.G6644T;p.G2215V                                                                             | NA | 18.58 | NA (NA)   | + | - | - | FMRP                             |
| <i>FAT3</i>   | WS1  | AR | M       | missense<br>SNV | 11q14.3 | 92533768      | A | C | FAT3:NM_001008781:exon9:c.A7589C;p.Q2530P                                                                             | NA | 14.54 |           | + | - | - | FMRP                             |
| <i>FBXO39</i> | WS32 | AD | de novo | missense<br>SNV | 17p13.1 | 6683407       | G | A | FBXO39:NM_153230:exon2:c.G220A;p.E74K                                                                                 | NA | 15.05 | 0.6868    | - | - | - |                                  |
|               |      |    |         |                 |         |               |   |   |                                                                                                                       |    |       | (78.2796% |   |   |   |                                  |
|               |      |    |         |                 |         |               |   |   |                                                                                                                       |    |       | )         |   |   |   |                                  |
| <i>FRMPD3</i> | WS51 | XL | M       | missense<br>SNV | Xq22.3  | 10684517<br>0 | T | C | FRMPD3:NM_032428:exon16:c.T4000C;p.C1334R                                                                             | NA | 15.61 | -0.5750   | + | + | - |                                  |
|               |      |    |         |                 |         |               |   |   |                                                                                                                       |    |       | (20.5329% |   |   |   |                                  |
|               |      |    |         |                 |         |               |   |   |                                                                                                                       |    |       | )         |   |   |   |                                  |
| <i>GNB1</i>   | WS43 | AD | de novo | missense<br>SNV | 1p36.33 | 1720572       | G | A | GNB1:NM_001282538:exon8:c.C536T;p.S179F,GNB1:NM_001282539:exon9:c.C836T;p.S279F,GNB1:NM_002074:exon10:c.C836T;p.S279F | NA | 34    | -0.4777   | + | - | + | Mental retardation gene,<br>FMRP |
|               |      |    |         |                 |         |               |   |   |                                                                                                                       |    |       | (28.3969% |   |   |   |                                  |
|               |      |    |         |                 |         |               |   |   |                                                                                                                       |    |       | )         |   |   |   |                                  |
| <i>GNL3L</i>  | WS9  | XL | M       | missense<br>SNV | Xp11.22 | 54565513      | G | T | GNL3L:NM_001184819:exon3:c.G60T;p.K20N,GNL3L:NM_00119067:exon3:c.G60T;p.K20N                                          | NA | 10.18 | -0.2386   | + | - | + |                                  |
|               |      |    |         |                 |         |               |   |   |                                                                                                                       |    |       | (37.1473% |   |   |   |                                  |
|               |      |    |         |                 |         |               |   |   |                                                                                                                       |    |       | )         |   |   |   |                                  |

|                |      |    |         |                        |          |               |     |   |                                                                                                                                     |                 |       |                       |   |   |   |                                     |
|----------------|------|----|---------|------------------------|----------|---------------|-----|---|-------------------------------------------------------------------------------------------------------------------------------------|-----------------|-------|-----------------------|---|---|---|-------------------------------------|
| <i>GOLGA5</i>  | WS24 | AD | de novo | nonsense               | 14q32.12 | 93299599      | C   | T | GOLGA5:NM_005113:exon10:c.C1852T:p.(Gln618*)                                                                                        | 0               | 40    | -0.0064<br>(49.1496%) | + | - | - |                                     |
| <i>GPR119</i>  | WS11 | XL | M       | missense<br>SNV        | Xq26.1   | 12951939<br>9 | C   | T | GPR119:NM_178471:exon1:c.G23A:p.G8E                                                                                                 | 0.0001554<br>73 | 17.37 | -0.3671<br>(29.4671%) | - | - | - |                                     |
| <i>GPRASP1</i> | WS46 | XL | M       | missense<br>SNV        | Xq22.1   | 10190990<br>4 | T   | A | GPRASP1:NM_001099410:exon4:c.T1063A:p.S355T,GPRASP1:NM_001099410:exon4:c.T1063A:p.S355T,GPRASP1:NM_001184727:exon6:c.T1063A:p.S355T | NA              |       | 0.2715<br>(66.7712%)  | + | + | - |                                     |
| <i>GPT2</i>    | WS31 | AD | de novo | frameshift<br>deletion | 16q11.2  | 46950598      | GCT | G | GPT2:NM_001142466:exon7:c.582_583del:p.(Phe195Serfs*4),GPT2:NM_133443:exon7:c.882_883del:p.(Phe295Serfs*4)                          | NA              |       | -0.1023<br>(44.6041%) | + | - | - | Mental<br>retardation gene          |
| <i>HMCN1</i>   | WS48 | AR | M       | missense<br>SNV        | 1q31.1   | 18594703<br>8 | A   | G | HMCN1:NM_031935:exon16:c.A2491G:p.N831D                                                                                             | NA              | 15.03 | -1.0936<br>(11.3099%) | + | - | - |                                     |
| <i>HMCN1</i>   | WS48 | AR | F       | missense<br>SNV        | 1q31.1   | 18613602<br>7 | G   | T | HMCN1:NM_031935:exon100:c.G15527T:p.R5176L                                                                                          | 0               | 12.08 |                       | + | - | - |                                     |
| <i>HUWE1</i>   | WS40 | XL | de novo | missense<br>SNV        | Xp11.22  | 53561638      | C   | A | HUWE1:NM_031407:exon82:c.G12670T:p.A4224S                                                                                           | 0.0001558<br>48 | 12.68 | -7.0236<br>(0.1567%)  | + | + | + | Mental<br>retardation gene,<br>FMRP |
| <i>ITM2A</i>   | WS51 | XL | M       | missense               | Xq21.1   | 78619020      | C   | T | ITM2A:NM_004867:                                                                                                                    | NA              |       | 0.0872                | + | - | - |                                     |

|                |      |    |         | SNV                    |          |               |           |   | SNV                                                                                                                     |    |       |                       |   |   |   |                                                                  |  |
|----------------|------|----|---------|------------------------|----------|---------------|-----------|---|-------------------------------------------------------------------------------------------------------------------------|----|-------|-----------------------|---|---|---|------------------------------------------------------------------|--|
| <i>KMT2D</i>   | WS1  | AD | de novo | missense<br>SNV        | 12q13.12 | 49427485      | G         | A | exon2:c.G143A:p.G4<br>8D<br>KMT2D:NM_003482<br>:exon39:c.C11003T:p<br>.P3668L                                           | 0  | 10.77 | -6.4882<br>(0.0880%)  | + | + | - | Mental<br>retardation gene,<br>FMRP, recurrent<br>in Epi4K study |  |
| <i>LHFPL1</i>  | WS24 | XL | M       | missense<br>SNV        | Xq23     | 11191445<br>6 | G         | A | LHFPL1:NM_17817<br>5:exon2:c.C163T:p.R<br>55W                                                                           | NA | 17.15 | 0.5292<br>(76.9592%)  | - | - | - |                                                                  |  |
| <i>MACF1</i>   | WS36 | AR | M       | missense<br>SNV        | 1p34.3   | 39926397      | C         | T | MACF1:NM_012090<br>:exon87:c.C15277T:p<br>.R5093W                                                                       | 0  | 21.4  | -3.7057<br>(0.5474%)  | + | - | + | FMRP                                                             |  |
| <i>MACF1</i>   | WS36 | AR | F       | missense<br>SNV        | 1p34.3   | 39816481      | C         | T | MACF1:NM_012090<br>:exon37:c.C4804T:p.<br>R1602C                                                                        | 0  | 24.6  |                       | + | - | + | FMRP                                                             |  |
| <i>MAOB</i>    | WS47 | XL | M       | missense<br>SNV        | Xp11.3   | 43661501      | C         | T | MAOB:NM_000898:<br>exon5:c.G394A:p.D1<br>32N                                                                            | NA | 19.48 | -0.6599<br>(17.5549%) | + | - | - |                                                                  |  |
| <i>MAP3K12</i> | WS21 | AD | de novo | missense<br>SNV        | 12q13.13 | 53879954      | C         | T | MAP3K12:NM_0011<br>93511:exon4:c.G707<br>A:p.R236Q,MAP3K1<br>2:NM_006301:exon5:<br>c.G608A:p.R203Q                      | NA | 23.2  | -0.9126<br>(15.3079%) | + | + | - | FMRP                                                             |  |
| <i>MAP3K15</i> | WS47 | XL | M       | frameshift<br>deletion | Xp22.12  | 19478123      | GGA<br>GT | G | MAP3K15:NM_0010<br>01671:exon5:c.864_8<br>67del:p.(Leu288Phefs<br>*14)                                                  | NA |       | 2.1341<br>(97.3354%)  | - | - | - |                                                                  |  |
| <i>MAP7D3</i>  | WS32 | XL | M       | missense<br>SNV        | Xq26.3   | 13531381<br>6 | G         | C | MAP7D3:NM_00117<br>3517:exon7:c.C1195<br>G:p.P399A,MAP7D3<br>:NM_001173516:exo<br>n8:c.C1246G:p.P416<br>A,MAP7D3:NM_024 | 0  | 12.08 | 0.6871<br>(82.9154%)  | - | - | - |                                                                  |  |

597:exon8:c.C1300G:

p.P434A

|               |      |    |         |                 |         |          |   |   |                                                                                                                                                                                           |                 |       |                       |   |   |   |      |
|---------------|------|----|---------|-----------------|---------|----------|---|---|-------------------------------------------------------------------------------------------------------------------------------------------------------------------------------------------|-----------------|-------|-----------------------|---|---|---|------|
| <i>ME3</i>    | WS27 | AD | de novo | splicing        | 11q14.2 | 86382803 | C | T | NM_001014811:exon2:c.183+1G>A;NM_001161586:exon3:c.183+1G>A;NM_006680:exon3:c.183+1G>A                                                                                                    | 0               | 18.46 | -0.9008<br>(15.6305%) | + | - | - |      |
| <i>MRPL17</i> | WS36 | AD | de novo | startloss       | 11p15.4 | 6704527  | T | G | MRPL17:NM_022061:exon1:c.A1C:p.M1L                                                                                                                                                        | 0               | 18.74 | -0.5005<br>(27.5367%) | + | - | + |      |
| <i>MSL3</i>   | WS53 | XL | M       | missense<br>SNV | Xp22.2  | 11780303 | A | G | MSL3:NM_001282174:exon5:c.A73G:p.I25V,MSL3:NM_006800:exon5:c.A22G:p.I8V,MSL3:NM_001193270:exon6:c.A484G:p.I162V,MSL3:NM_078628:exon6:c.A520G:p.I174V,MSL3:NM_078629:exon6:c.A520G:p.I174V | 0               | 16.69 | -0.2932<br>(34.0125%) | + | - | - |      |
| <i>MYCBP2</i> | WS38 | AD | F       | missense<br>SNV | 13q22.3 | 77672537 | C | T | MYCBP2:NM_015057:exon56:c.G8752A:p.A2918T                                                                                                                                                 | NA              | 16.95 | NA (NA)               | + | - | - | FMRP |
| <i>MYCBP2</i> | WS38 | AD | de novo | missense<br>SNV | 13q22.3 | 77752076 | T | C | MYCBP2:NM_015057:exon35:c.A5147G:p.N1716S                                                                                                                                                 | NA              | 15.22 |                       | + | - | - | FMRP |
| <i>MYO18A</i> | WS5  | AR | M       | missense<br>SNV | 17q11.2 | 27493915 | C | T | MYO18A:NM_078471:exon2:c.G44A:p.R15Q,MYO18A:NM_0203318:exon2:c.G44A:p.R15Q                                                                                                                | 0.0001948<br>18 | 21.8  | -0.5903<br>(24.3597%) | + | + | + | FMRP |

|               |      |    |         |                 |          |               |   |   |                                                                                                                                                              |    |       |                      |   |   |   |                                                           |
|---------------|------|----|---------|-----------------|----------|---------------|---|---|--------------------------------------------------------------------------------------------------------------------------------------------------------------|----|-------|----------------------|---|---|---|-----------------------------------------------------------|
| <i>MYO18A</i> | WS5  | AR | F       | missense<br>SNV | 17q11.2  | 27437031      | C | T | MYO18A:NM_078471:exon19:c.G3176A:p.R1059H,MYO18A:NM_203318:exon19:c.G3176A:p.R1059H                                                                          | 0  | 19.11 |                      | + | + | + | FMRP                                                      |
| <i>MYO1H</i>  | WS42 | AD | de novo | splicing        | 12q24.11 | 10984979<br>1 | G | A | NM_001101421:exon13:c.1454+1G>A                                                                                                                              | NA | 19.66 | 0.5454<br>(73.3920%) | - | - | - |                                                           |
| <i>NOS3</i>   | WS13 | AD | de novo | missense<br>SNV | 7q36.1   | 15069610<br>1 | C | T | NOS3:NM_001160109:exon7:c.C884T;p.A295V,NOS3:NM_001160110:exon7:c.C884T;p.A295V,NOS3:NM_001160111:exon7:c.C884T;p.A295V,NOS3:NM_000603:exon8:c.C884T;p.A295V | NA | 17.61 | 0.1800<br>(58.1623%) | + | - | + | Calcium signaling pathway, Mouse model presented seizures |
| <i>NPC1L1</i> | WS34 | AR | M       | missense<br>SNV | 7p13     | 44574110      | A | G | NPC1L1:NM_001101648:exon6:c.T2102C;p.V701A,NPC1L1:NM_001300967:exon6:c.T2102C;p.V701A,NPC1L1:NM_013389:exon6:c.T2102C;p.V701A                                | NA | 21.3  | 0.6433<br>(76.8719%) | - | - | - |                                                           |
| <i>NPC1L1</i> | WS34 | AR | F       | missense<br>SNV | 7p13     | 44561319      | G | A | NPC1L1:NM_001101648:exon12:c.C2945T;p.S982L,NPC1L1:NM_013389:exon12:c.C2945T;p.S982L                                                                         | 0  | 17.64 |                      | - | - | - |                                                           |
| <i>OR8D2</i>  | WS34 | AD | de novo | missense<br>SNV | 11q24.2  | 12418949<br>8 | A | C | OR8D2:NM_001002918:exon1:c.T596G;p.L199R                                                                                                                     | NA | 18.54 | NA (NA)              | - | - | - |                                                           |

|               |      |    |         |                 |         |          |   |   |                                                                                                                                                                                                                                                                                                                     |    |       |                       |   |   |   |                                 |
|---------------|------|----|---------|-----------------|---------|----------|---|---|---------------------------------------------------------------------------------------------------------------------------------------------------------------------------------------------------------------------------------------------------------------------------------------------------------------------|----|-------|-----------------------|---|---|---|---------------------------------|
| <i>ORC3</i>   | WS46 | AD | de novo | missense<br>SNV | 6q15    | 88374486 | G | C | ORC3:NM_0011972<br>59:exon17:c.G1430C:<br>p.G477A,ORC3:NM_<br>012381:exon18:c.G1<br>859C:p.G620A,ORC<br>3:NM_181837:exon1<br>8:c.G1862C:p.G621A                                                                                                                                                                     | 0  | 17.58 | 0.4438<br>(69.5210%)  | + | - | - |                                 |
| <i>PARS2</i>  | WS19 | AR | F       | nonsense        | 1p32.3  | 55224777 | G | A | PARS2:NM_152268:<br>exon2:c.C58T;p.(Gln<br>20*)                                                                                                                                                                                                                                                                     | NA | 10.15 | -0.2137<br>(39.5308%) | + | - | - |                                 |
| <i>PARS2</i>  | WS19 | AR | M       | missense<br>SNV | 1p32.3  | 55224299 | A | G | PARS2:NM_152268:<br>exon2:c.T536C;p.F17<br>9S                                                                                                                                                                                                                                                                       | NA | 14.5  |                       | + | - | - |                                 |
| <i>PFKFB4</i> | WS11 | AD | de novo | missense<br>SNV | 3p21.31 | 48573003 | G | A | PFKFB4:NM_00131<br>7135:exon9:c.C929T:<br>p.T310M,PFKFB4:N<br>M_001317136:exon9:<br>c.C896T;p.T299M,PF<br>KFB4:NM_00131713<br>7:exon9:c.C929T;p.T<br>310M,PFKFB4:NM_<br>004567:exon9:c.C929<br>T;p.T310M,PFKFB4:<br>NM_001317134:exon<br>10:c.C1016T;p.T339<br>M,PFKFB4:NM_001<br>317138:exon10:c.C35<br>6T;p.T119M | NA | 22.5  | -1.0328<br>(12.5318%) | + | + | - |                                 |
| <i>PHKA1</i>  | WS33 | XL | M       | missense<br>SNV | Xq13.2  | 71855062 | G | A | PHKA1:NM_001122<br>670:exon16:c.C1657<br>T;p.R553C,PHKA1:N<br>M_001172436:exon1<br>6:c.C1657T;p.R553C,                                                                                                                                                                                                              | 0  |       | -2.1944<br>(1.8809%)  | - | - | - | Calcium<br>signaling<br>pathway |



|                 |      |    |         |                 |         |               |   |   | PHKA1:NM_002637:<br>exon16:c.C1657T;p.R<br>553C                                                                           |                 |       |                       |   |   |   |  |
|-----------------|------|----|---------|-----------------|---------|---------------|---|---|---------------------------------------------------------------------------------------------------------------------------|-----------------|-------|-----------------------|---|---|---|--|
| <i>PLEKHG2</i>  | WS30 | AD | de novo | missense<br>SNV | 19q13.2 | 39915314      | C | T | PLEKHG2:NM_022835:exon19:c.C3541T:p.L1181F                                                                                | NA              | 15.16 | 1.5287<br>(93.9492%)  | + | - | - |  |
| <i>PNMA1</i>    | WS1  | AD | de novo | missense<br>SNV | 14q24.3 | 74179463      | C | A | PNMA1:NM_006029:exon1:c.G880T;p.V294F                                                                                     | NA              | 22.8  | -0.3016<br>(35.6696%) | + | - | + |  |
| <i>PNMA3</i>    | WS30 | XL | M       | missense<br>SNV | Xq28    | 15222573<br>4 | C | T | PNMA3:NM_001282535:exon2:c.C322T;p.R108C,PNMA3:NM_013364:exon2:c.C322T;p.R108C                                            | 0.0001554<br>48 |       | -0.3484<br>(31.0345%) | + | - | - |  |
| <i>PNPLA4</i>   | WS13 | XL | M       | missense<br>SNV | Xp22.31 | 7889777       | A | G | PNPLA4:NM_001172672:exon3:c.T127C:p.S43P,PNPLA4:NM_001142389:exon4:c.T388C;p.S130P,PNPLA4:NM_004650:exon4:c.T388C;p.S130P | NA              |       | 0.4179<br>(73.3542%)  | + | - | - |  |
| <i>POFUT2</i>   | WS42 | AD | de novo | missense<br>SNV | 21q22.3 | 46705701      | A | T | POFUT2:NM_015227:exon2:c.T274A;p.W92R,POFUT2:NM_133635:exon2:c.T274A;p.W92R                                               | NA              | 24.3  | -0.0472<br>(47.1848%) | + | + | - |  |
| <i>PRICKLE3</i> | WS16 | XL | M       | missense<br>SNV | Xp11.23 | 49032467      | C | T | PRICKLE3:NM_001307979:exon9:c.G1199A;p.R400H,PRICKLE3:NM_006150:exon9:c.G1403A;p.R468H                                    | 0               | 17.07 | 1.0143<br>(89.1850%)  | - | - | - |  |
| <i>REPS2</i>    | WS4  | XL | M       | missense        | Xp22.2  | 17080566      | C | T | REPS2:NM_0010809                                                                                                          | NA              | 11.44 | -0.5155               | + | - | - |  |

|             |      |    |   |                 |         |               |   |   |                                                                                                  |                 |       |                      |   |   |   |                                                                                                             |
|-------------|------|----|---|-----------------|---------|---------------|---|---|--------------------------------------------------------------------------------------------------|-----------------|-------|----------------------|---|---|---|-------------------------------------------------------------------------------------------------------------|
|             |      |    |   | SNV             |         |               |   |   | 75:exon9:c.C1117T;p.<br>P373S,REPS2:NM_0<br>04726:exon9:c.C1120<br>T;p.P374S                     |                 |       | (23.0408%            |   |   |   |                                                                                                             |
| <i>RPGR</i> | WS29 | XL | M | missense<br>SNV | Xp11.4  | 38180324      | A | G | RPGR:NM_000328:e<br>xon4:c.T266C;p.V89<br>A,RPGR:NM_00103<br>4853:exon4:c.T266C:<br>p.V89A       | NA              | 18.04 | 2.2110<br>(97.8056%  | + | - | - |                                                                                                             |
| <i>RYR1</i> | WS21 | AR | F | missense<br>SNV | 19q13.2 | 38946118      | A | G | RYR1:NM_000540:e<br>xon15:c.A1604G;p.N<br>535S,RYR1:NM_001<br>042723:exon15:c.A1<br>604G;p.N535S | 0.0001739<br>33 | 15.5  | -5.4856<br>(0.1271%) | + | + | - | Calcium<br>signaling<br>pathway                                                                             |
| <i>RYR1</i> | WS21 | AR | M | missense<br>SNV | 19q13.2 | 38935236      | G | A | RYR1:NM_000540:e<br>xon7:c.G550A;p.A18<br>4T,RYR1:NM_00104<br>2723:exon7:c.G550A<br>:p.A184T     | 0.0004064<br>57 | 12.97 |                      | + | + | - | Calcium<br>signaling<br>pathway                                                                             |
| <i>RYR2</i> | WS29 | AR | M | missense<br>SNV | 1q43    | 23772990<br>0 | A | G | RYR2:NM_001035:e<br>xon28:c.A3248G;p.E<br>1083G                                                  | 0.0001060<br>78 | 17.67 | -6.5324<br>(0.0782%) | + | + | - | Calcium<br>signaling<br>pathway, Mouse<br>model presented<br>seizures, FMRP,<br>recurrent in<br>Epi4K study |
| <i>RYR2</i> | WS29 | AR | F | missense<br>SNV | 1q43    | 23779827<br>9 | C | T | RYR2:NM_001035:e<br>xon44:c.C6779T;p.P2<br>260L                                                  | 0.0006165<br>23 | 22.6  |                      | + | + | - | Calcium<br>signaling<br>pathway, Mouse<br>model presented<br>seizures, FMRP,<br>recurrent in<br>Epi4K study |

|                |      |    |         |                 |          |          |   |   |                                                                                                                                    |           |       |                       |   |   |   |                                            |
|----------------|------|----|---------|-----------------|----------|----------|---|---|------------------------------------------------------------------------------------------------------------------------------------|-----------|-------|-----------------------|---|---|---|--------------------------------------------|
| <i>RYR3</i>    | WS56 | AR | F       | missense<br>SNV | 15q14    | 33936671 | A | G | RYR3:NM_001036:exon28:c.A3716G:p.K1239R,RYR3:NM_001243996:exon28:c.A3716G:p.K1239R                                                 | 0.0001161 | 24    | -4.2466<br>(0.3421%)  | + | - | - | Calcium signaling pathway                  |
| <i>RYR3</i>    | WS56 | AR | M       | missense<br>SNV | 15q14    | 33941340 | C | T | RYR3:NM_001036:exon31:c.C4046T:p.T1349I,RYR3:NM_001243996:exon31:c.C4046T:p.T1349I                                                 | 0.000116  | 27.7  |                       | + | - | - | Calcium signaling pathway                  |
| <i>SH3KBP1</i> | WS32 | XL | M       | missense<br>SNV | Xp22.12  | 19606776 | G | A | SH3KBP1:NM_001084960:exon7:c.C569T:p.P190L,SH3KBP1:NM_001024666:exon11:c.C1172T:p.P391L,SH3KBP1:NM_0011892:exon12:c.C1283T:p.P428L | 0         | 20.6  | -0.5977<br>(19.2790%) | + | - | + |                                            |
| <i>SHROOM2</i> | WS4  | XL | M       | missense<br>SNV | Xp22.2   | 9863900  | C | A | SHROOM2:NM_0010649:exon4:c.C1952A:p.T651N                                                                                          | NA        |       | 4.8639<br>(99.8433%)  | + | - | - |                                            |
| <i>SIPA1L3</i> | WS13 | AR | F       | missense<br>SNV | 19q13.13 | 38673323 | G | C | SIPA1L3:NM_001015073:exon16:c.G4373C:p.G1458A                                                                                      | 0.0002120 | 16.89 | 1.3384<br>(91.9550%)  | + | + | - | FMRP                                       |
| <i>SIPA1L3</i> | WS13 | AR | M       | missense<br>SNV | 19q13.13 | 38684393 | G | A | SIPA1L3:NM_001015073:exon18:c.G4813A:p.A1605T                                                                                      | 0.0006165 |       |                       | + | + | - | FMRP                                       |
| <i>SLC37A1</i> | WS12 | AD | de novo | missense<br>SNV | 21q22.3  | 43994967 | C | A | SLC37A1:NM_001064:exon19:c.C1463A:p.P488Q                                                                                          | NA        | 17.17 | 0.3415<br>(65.2395%)  | + | + | - |                                            |
| <i>TAF1</i>    | WS51 | XL | M       | missense<br>SNV | Xq13.1   | 70587404 | C | A | TAF1:NM_001028607:exon2:c.C236A:p.(Thr79Asn),TAF1:NM                                                                               | NA        | 18.13 | -2.7937<br>(0.9404%)  | + | + | - | Mental retardation gene, recurrent in this |

|              |      |    |   |                   |         |           |   |          |                                                                                                                                              |                                                                              |       |                       |   |   |   |                                                            |
|--------------|------|----|---|-------------------|---------|-----------|---|----------|----------------------------------------------------------------------------------------------------------------------------------------------|------------------------------------------------------------------------------|-------|-----------------------|---|---|---|------------------------------------------------------------|
|              |      |    |   |                   |         |           |   |          |                                                                                                                                              | _004606:exon2:c.C236A:p.(Thr79Asn),TAF1:NM_138923:exon2:c.C236A:p.(Thr79Asn) |       |                       |   |   |   | and Epi4K study                                            |
| <i>TAF1</i>  | WS15 | XL | M | missense SNV      | Xq13.1  | 70644046  | G | A        | TAF1:NM_001286074:exon32:c.G4771A:p.(Asp1591Asn),TAF1:NM_004606:exon32:c.G4771A:p.(Asp1591Asn),TAF1:NM_138923:exon32:c.G4708A:p.(Asp1570Asn) | 0                                                                            | 12.31 |                       | + | + | - | Mental retardation gene, recurrent in this and Epi4K study |
| <i>TAF7L</i> | WS45 | XL | M | missense SNV      | Xq22.1  | 100531008 | C | T        | TAF7L:NM_001168474:exon11:c.G1006A:p.V336M,TAF7L:NM_024885:exon11:c.G1264A:p.V422M                                                           | NA                                                                           | 18.7  | 0.1024<br>(57.0533%)  | - | - | - |                                                            |
| <i>TDRD6</i> | WS19 | AR | F | inframe insertion | 6p12.3  | 46656920  | A | AGT<br>T | TDRD6:NM_001010870:exon1:c.1055_1056insGTT;p.E352delinsEL,TDRD6:NM_001168359:exon1:c.1055_1056insGTT;p.E352delinsEL                          | 0.0008830<br>46                                                              |       | 1.4798<br>(93.5093%)  | - | - | - |                                                            |
| <i>TDRD6</i> | WS19 | AR | M | missense SNV      | 6p12.3  | 46656046  | G | T        | TDRD6:NM_001010870:exon1:c.G181T;p.A61S,TDRD6:NM_001168359:exon1:c.G181T;p.A61S                                                              | NA                                                                           | 10.12 |                       | - | - | - |                                                            |
| <i>TECTA</i> | WS28 | AR | M | missense SNV      | 11q23.3 | 121039502 | G | A        | TECTA:NM_005422:exon19:c.G5867A:p.R1956Q                                                                                                     | 0.000106                                                                     | 36    | -1.0022<br>(13.1672%) | - | - | - | Mouse model presented seizures                             |

|              |      |    |         |                 |          |               |   |   |                                                                                                                                                           |                 |       |                           |   |   |   |                                      |
|--------------|------|----|---------|-----------------|----------|---------------|---|---|-----------------------------------------------------------------------------------------------------------------------------------------------------------|-----------------|-------|---------------------------|---|---|---|--------------------------------------|
| <i>TECTA</i> | WS28 | AR | F       | missense<br>SNV | 11q23.3  | 12099613<br>8 | A | G | TECTA:NM_005422:<br>exon7:c.A1331G;p.Y<br>444C                                                                                                            | 5.79845E-<br>05 | 19.55 |                           | - | - | - | Mouse model<br>presented<br>seizures |
| <i>TGM3</i>  | WS16 | AD | de novo | missense<br>SNV | 20p13    | 2306536       | A | G | TGM3:NM_003245:e<br>xon8:c.A1025G;p.D3<br>42G                                                                                                             | NA              | 17.33 | 1.1626<br>(89.3157%<br>)  | - | - | + |                                      |
| <i>TPCN1</i> | WS36 | AD | de novo | missense<br>SNV | 12q24.13 | 113731111     | C | T | TPCN1:NM_001301<br>214:exon26:c.C2087<br>T;p.T696I,TPCN1:N<br>M_017901:exon27:c.<br>C2291T;p.T764I,TPC<br>N1:NM_001143819:e<br>xon28:c.C2507T;p.T8<br>36I | 0               | 25.1  | -1.4431<br>(6.5200%)      | + | + | - |                                      |
| <i>UBA1</i>  | WS45 | XL | M       | missense<br>SNV | Xp11.23  | 47071859      | C | T | UBA1:NM_003334:e<br>xon21:c.C2501T;p.P8<br>34L,UBA1:NM_1532<br>80:exon21:c.C2501T:<br>p.P834L                                                             | NA              | 14.42 | -1.3428<br>(6.7398%)      | + | + | + | FMRP                                 |
| <i>ULK4</i>  | WS49 | AR | M       | missense<br>SNV | 3p22.1   | 41756745      | C | A | ULK4:NM_017886:e<br>xon25:c.G2618T;p.S8<br>73I                                                                                                            | 0               | 14.03 | 1.0038<br>(86.4516%<br>)  | - | - | - |                                      |
| <i>ULK4</i>  | WS49 | AR | F       | missense<br>SNV | 3p22.1   | 41759338      | G | C | ULK4:NM_017886:e<br>xon23:c.C2337G;p.I7<br>79M                                                                                                            | 0.0001060<br>33 | 15.59 |                           | - | - | - |                                      |
| <i>USP51</i> | WS29 | XL | M       | missense<br>SNV | Xp11.21  | 55513883      | G | A | USP51:NM_201286:<br>exon2:c.C1490T;p.T4<br>97I                                                                                                            | NA              | 15.78 | -0.7490<br>(15.9875%<br>) | - | - | - |                                      |
| <i>UTP6</i>  | WS31 | AR | F       | missense<br>SNV | 17q11.2  | 30205767      | A | G | UTP6:NM_018428:e<br>xon12:c.T1001C;p.L3<br>34S                                                                                                            | NA              | 13.78 | 0.1365<br>(56.1290%<br>)  | + | + | - |                                      |
| <i>UTP6</i>  | WS31 | AR | M       | missense<br>SNV | 17q11.2  | 30221704      | C | A | UTP6:NM_018428:e<br>xon4:c.G272T;p.R91                                                                                                                    | 0               | 32    |                           | + | + | - |                                      |

|         |      |    |   |                 |          |               |   |   |                                                    |                 |       |                      |   | L |   |  |
|---------|------|----|---|-----------------|----------|---------------|---|---|----------------------------------------------------|-----------------|-------|----------------------|---|---|---|--|
| VWA3A   | WS20 | AR | F | splicing        | 16p12.2  | 22142603      | A | G | NM_173615:exon18:<br>c.1727+3A>G                   | 0               | 13.49 | 1.8918<br>(96.3441%) | - | - | - |  |
| VWA3A   | WS20 | AR | M | missense<br>SNV | 16p12.2  | 22162070      | C | T | VWA3A:NM_173615<br>:exon30:c.C3184T:p.<br>P1062S   | 0.0002924<br>32 | 18.23 |                      | - | - | - |  |
| WDFY4   | WS13 | AR | M | missense<br>SNV | 10q11.23 | 50109854      | C | G | WDFY4:NM_020945<br>:exon47:c.C7532G:p.<br>S2511C   | NA              | 13.09 | NA (NA)              | - | - | - |  |
| WDFY4   | WS13 | AR | F | missense<br>SNV | 10q11.23 | 50167799      | G | A | WDFY4:NM_020945<br>:exon53:c.G8164A:p.<br>V2722M   | 0.0001953<br>51 | 21.9  |                      | - | - | - |  |
| ZCCHC16 | WS16 | XL | M | missense<br>SNV | Xq23     | 11169877<br>3 | C | T | ZCCHC16:NM_0010<br>04308:exon3:c.C817<br>T:p.R273C | 0               | 10.93 | 0.7419<br>(84.4828%) | - | - | - |  |
| ZRSR2   | WS14 | XL | M | missense<br>SNV | Xp22.2   | 15808631      | G | A | ZRSR2:NM_005089:<br>exon1:c.G13A:p.E5K             | NA              | 14.81 | 0.3806<br>(71.9436%) | + | + | - |  |

Inherited from: F-father, M-mother, de novo-neither from father or mother; Frequency in gnomAD East Asian:0- not recorded but different variant recorded at the same loci, NA-none variant recorded in this loci

Supplementary Table S5 Comparison of mental retardation gene variants carriers phenotypes in our study and literature

| Clinical features          | <i>GPT2</i>                                                   |                           | <i>HUWE1</i>                                                      |                           | <i>GNB1</i>                                                                       |                           | <i>KMT2D</i>                                                                             |                           | <i>TAF1</i>                                                                                                                                    |                           |                           |     |
|----------------------------|---------------------------------------------------------------|---------------------------|-------------------------------------------------------------------|---------------------------|-----------------------------------------------------------------------------------|---------------------------|------------------------------------------------------------------------------------------|---------------------------|------------------------------------------------------------------------------------------------------------------------------------------------|---------------------------|---------------------------|-----|
|                            | Previous reports                                              | WS31-P                    | Previous reports                                                  | WS40-P                    | Previous reports                                                                  | WS43-P                    | Previous reports                                                                         | WS1-P                     | Previous reports                                                                                                                               | WS51-P                    | WS15-P                    |     |
| GSex                       | Male,female                                                   | Male                      | Male                                                              | Male                      | Male, female                                                                      | Male                      | Male, female                                                                             | Female                    | Male                                                                                                                                           | Male                      | Male                      |     |
| Age (years)                | 4–22.4                                                        | 6.5 (died)                | 10–56                                                             | 6.5                       | 1–20                                                                              | 4                         | 0.25–22                                                                                  | 3                         | 1–22                                                                                                                                           | 5.3                       | 6.8                       |     |
| Perinatal period           | Normal                                                        | Normal                    | Normal                                                            | Normal                    | Feeding difficulty,<br>sucking problem                                            | Normal                    | Feeding difficulty                                                                       | Normal                    | Feeding difficulty, seizure,<br>icterus neonatorum                                                                                             | Normal                    | Normal                    |     |
| Growth                     | Intrauterine<br>growth<br>restriction                         | N/A                       | -                                                                 | +                         | -                                                                                 | N/A                       | -                                                                                        | +/-                       | -                                                                                                                                              | +                         | -                         | -   |
|                            | Postnatal<br>retardation                                      | +                         | -                                                                 | +                         | -                                                                                 | +                         | -                                                                                        | +                         | Underweight,<br>moderate<br>malnutrition                                                                                                       | +                         | -                         | -   |
| Psychomotor<br>development | General<br>retardation<br>(+–+++)                             | +++                       | +++                                                               | +–+++                     | +++                                                                               | +++                       | ++–+++                                                                                   | +++                       | +++                                                                                                                                            | +–+++                     | -                         | +++ |
|                            | Motor delay                                                   | +                         | +                                                                 | +                         | +                                                                                 | +                         | +                                                                                        | +                         | +                                                                                                                                              | +                         | +                         | +   |
|                            | Language<br>retardation                                       | +(Dysarthria)             | +                                                                 | +                         | +                                                                                 | +                         | +                                                                                        | +                         | +                                                                                                                                              | +                         | -                         | +   |
|                            | Cognitive<br>impairment                                       | +                         | +                                                                 | +                         | +                                                                                 | +                         | +                                                                                        | +                         | +                                                                                                                                              | N/A                       | -                         | +   |
| Facial feature             | Dependence                                                    | +                         | +                                                                 | +                         | +                                                                                 | +                         | +                                                                                        | +                         | +                                                                                                                                              | N/A                       | -                         | +   |
|                            | Low-set ears, high<br>palatal arch, upper<br>teeth projecting | Supplementary<br>Figure 2 | Long face, high<br>palatal arch,<br>micrognathia,<br>bulbous nose | Supplementary<br>Figure 2 | Fissura palatina, high<br>palatal arch, short<br>philtrum, protruding<br>incisors | Supplementary<br>Figure 2 | Lower palpebral<br>eversion, short nasal<br>septum, arched<br>eyebrows, prominent<br>ear | Supplementary<br>Figure 2 | Aural abnormality (low-set<br>ear/protruding ear), high<br>palatal arch, nasal abnormality<br>(wide upturned nose, bulbous<br>nose), long face | Supplementary<br>Figure 2 | Supplementary<br>Figure 2 |     |

|                |                       |                                                       |                                            |                                               |                                             |                                                                 |    |                                                                                                 |                                                                    |                                                                                                            |                                                 |                   |
|----------------|-----------------------|-------------------------------------------------------|--------------------------------------------|-----------------------------------------------|---------------------------------------------|-----------------------------------------------------------------|----|-------------------------------------------------------------------------------------------------|--------------------------------------------------------------------|------------------------------------------------------------------------------------------------------------|-------------------------------------------------|-------------------|
|                | Physical examination  | Microencephalopathy, spastic paralysis, hyperreflexia | Limbs hypotonia                            | Microencephalopathy                           | Slightly hypertonia                         | Muscle tension change (hypotonia or hypertonia)                 | -  | Microencephalopathy, hypotonia                                                                  | Hypertonia                                                         | Dystonia, encephalopathy, spastic paralysis                                                                | -                                               | Flaccid paralysis |
|                | Epilepsy              | +                                                     | WS                                         | +/-                                           | WS                                          | +                                                               | WS | +                                                                                               | WS                                                                 | +                                                                                                          | WS                                              | WS                |
| Nervous system |                       |                                                       |                                            |                                               | Bilateral                                   |                                                                 |    |                                                                                                 | Mild                                                               |                                                                                                            |                                                 |                   |
|                | Radiology             | Callosal agenesis, cerebellar atrophy                 | 3 days after birth subarachnoid hemorrhage | Holoprosencephaly, ventriculomegaly           | parietal lobes atrophy: cerebral hypoplasia | Ventriculomegaly, cerebellar atrophy                            | -  | Polymicrogyria, hydrocephalus, subarachnoid edema                                               | y, widened cerebral sulci, cerebral fissures and cerebral cisterns | Corpus callosum dysplasia, ventriculomegaly, cerebellar atrophy                                            | Left temporal site arachnoid cyst               | -                 |
|                | Eyes                  | N/A                                                   | -                                          | Strabismus                                    | -                                           | Nystagmus, strabismus                                           | -  | Ptosis, strabismus                                                                              | -                                                                  | Nystagmus, strabismus                                                                                      | Normal                                          | Normal            |
|                | Cardiovascular system | Mitral valve murmur                                   | -                                          | Aortic valve murmur                           | -                                           | -                                                               | -  | Aorta coarctation, atrial septal defect, ventricular septal defect, trilog of Fallot            | -                                                                  | Atrial septal defect, aorta coarctation                                                                    | Atrial septal defect, ventricular septal defect | Normal            |
| Other systems  |                       |                                                       |                                            |                                               |                                             |                                                                 |    | Short and incurved fifth fingers, mainly from                                                   |                                                                    | Joint hypermotility, gluteal crease with sacral caudal remnant, sacral dimple, prominent protruding coccyx |                                                 |                   |
|                | Skeletal system       | Scoliosis, adduction of thumb                         | -                                          | Short fifth fingers and toes, thorax abnormal | -                                           | Limited motion of joints, Joint hypermotility, pectus excavatum | -  | brachymesophalangy V, deformed vertebrae and/or rib anomalies and dislocation of the hip joints | -                                                                  |                                                                                                            | N/A                                             | N/A               |
|                | Urogenital system     | Normal                                                | -                                          | Phimosi, cryptorchidism                       | -                                           | Hydronephrosis                                                  | -  | Hydronephrosis, cryptorchidism, micropenis                                                      | -                                                                  | Cryptorchidism, hydronephrosis, vesicoureteric reflux                                                      | -                                               | -                 |
|                | Others                | Hypotonia, oromotor dysfunction, drooling             | -                                          | Eczema, constipation                          | -                                           | Cleft palate, hypotonia                                         | -  | Aspiration pneumonia, cafe au                                                                   | Congenital laryngeal                                               | Hypotonia                                                                                                  | -                                               | -                 |



lait spots, hirsutism

cartilage

dysplasia

---

Supplementary Table S6 *TTN* variants

| Gene       | Family ID | Inheritance pattern | Inherited from | Variant type | Cytoband | POS       | REF | ALT | Variants description                                                                                                                                                                                                                                              | Frequency in gnomAD East Asian |
|------------|-----------|---------------------|----------------|--------------|----------|-----------|-----|-----|-------------------------------------------------------------------------------------------------------------------------------------------------------------------------------------------------------------------------------------------------------------------|--------------------------------|
| <i>TTN</i> | WS38      | AR                  | F              | missense SNV | 2q31.2   | 179426023 | T   | A   | TTN:NM_003319:exon151:c.A41417T;p.H13806L,TTN:NM_133432:exon152:c.A41792T;p.H13931L,TTN:NM_133437:exon152:c.A41993T;p.H13998L,TTN:NM_133378:exon272:c.A60908T;p.H20303L,TTN:NM_001256850:exon273:c.A63689T;p.H21230L,TTN:NM_001267550:exon323:c.A68612T;p.H22871L | NA                             |
| <i>TTN</i> | WS38      | AR                  | M              | missense SNV | 2q31.2   | 179435385 | T   | G   | TTN:NM_003319:exon154:c.A48279C;p.L16093F,TTN:NM_133432:exon155:c.A48654C;p.L16218F,TTN:NM_133437:exon155:c.A48855C;p.L16285F,TTN:NM_133378:exon275:c.A67770C;p.L22590F,TTN:NM_001256850:exon276:c.A70551C;p.L23517F,TTN:NM_001267550:exon326:c.A75474C;p.L25158F | 0                              |
| <i>TTN</i> | WS38      | AR                  | M              | missense SNV | 2q31.2   | 179435385 | C   | G   | TTN:NM_003319:exon104:c.G25713C;p.E8571D,TTN:NM_133432:exon105:c.G26088C;p.E8696D,TTN:NM_133437:exon105:c.G26289C;p.E8763D,TTN:NM_133378:exon225:c.G45204C;p.E15068D,TTN:NM_001256850:exon226:c.G47985C;p.E15995D,TTN:NM_001267550:exon276:c.G52908C;p.E17636D    | 0.00118                        |
| <i>TTN</i> | WS1       | AR                  | M              | missense SNV | 2q31.2   | 179446909 | C   | T   | TTN:NM_003319:exon143:c.G38992A;p.V12998I,TTN:NM_133432:exon144:c.G39367A;p.V13123I,TTN:NM_133437:exon144:c.G39568A;p.V13190I,TTN:NM_133378:exon264:c.G58483A;p.V19495I,TTN:NM_001256850:exon265:c.G61264A;p.V20422I,TTN:NM_001267550:exon315:c.G66187A;p.V22063I | 0                              |
| <i>TTN</i> | WS1       | AR                  | M              | missense SNV | 2q31.2   | 179477562 | T   | G   | TTN:NM_003319:exon93:c.A22691C;p.N7564T,TTN:NM_133432:exon94:c.A23066C;p.N7689T,TTN:NM_133437:exon94:c.A23267C;p.N7756T,TTN:NM_133378:exon214:c.A42182C;p.N14061T,TTN:NM_001256850:exon215:c.A44963C;p.N14988T,TTN:NM_001267550:exon265:c.A49886C;p.N16629T       | 0                              |
| <i>TTN</i> | WS1       | AR                  | F              | missense SNV | 2q31.2   | 179427284 | T   | C   | TTN:NM_003319:exon154:c.A56380G;p.K18794E,TTN:NM_133432:exon155:c.A56755G;p.K18919E,TTN:NM_133437:exon155:c.A56956G;p.K18986E,TTN:NM_133378:exon275:c.A75871G;p.K25291E,TTN:NM_                                                                                   | 0.000935                       |

|            |      |    |   |              |        |           |   |   |                                                                                                                                                                                                                                                                   |                                                                                    |  |
|------------|------|----|---|--------------|--------|-----------|---|---|-------------------------------------------------------------------------------------------------------------------------------------------------------------------------------------------------------------------------------------------------------------------|------------------------------------------------------------------------------------|--|
|            |      |    |   |              |        |           |   |   |                                                                                                                                                                                                                                                                   | 001256850:exon276:c.A78652G:p.K26218E,TTN:NM_001267550:exon326:c.A83575G:p.K27859E |  |
| <i>TTN</i> | WS1  | AR | F | missense SNV | 2q31.2 | 179428309 | G | A | TTN:NM_003319:exon154:c.C55355T:p.T18452I,TTN:NM_133432:exon155:c.C55730T:p.T18577I,TTN:NM_133437:exon155:c.C55931T:p.T18644I,TTN:NM_133378:exon275:c.C74846T:p.T24949I,TTN:NM_001256850:exon276:c.C77627T:p.T25876I,TTN:NM_001267550:exon326:c.C82550T:p.T27517I | NA                                                                                 |  |
| <i>TTN</i> | WS49 | AR | F | missense SNV | 2q31.2 | 179442541 | T | A | TTN:NM_003319:exon151:c.A41417T:p.H13806L,TTN:NM_133432:exon152:c.A41792T:p.H13931L,TTN:NM_133437:exon152:c.A41993T:p.H13998L,TTN:NM_133378:exon272:c.A60908T:p.H20303L,TTN:NM_001256850:exon273:c.A63689T:p.H21230L,TTN:NM_001267550:exon323:c.A68612T:p.H22871L | 0.000176                                                                           |  |
| <i>TTN</i> | WS49 | AR | M | missense SNV | 2q31.2 | 179599581 | C | T | TTN:NM_133378:exon48:c.G11338A:p.E3780K,TTN:NM_001256850:exon49:c.G14119A:p.E4707K,TTN:NM_001267550:exon51:c.G15070A:p.E5024K                                                                                                                                     | 0.000698                                                                           |  |
| <i>TTN</i> | WS49 | AR | M | missense SNV | 2q31.2 | 179458585 | C | T | TTN:NM_003319:exon126:c.G31247A:p.G10416E,TTN:NM_133432:exon127:c.G31622A:p.G10541E,TTN:NM_133437:exon127:c.G31823A:p.G10608E,TTN:NM_133378:exon247:c.G50738A:p.G16913E,TTN:NM_001256850:exon248:c.G53519A:p.G17840E,TTN:NM_001267550:exon298:c.G58442A:p.G19481E | NA                                                                                 |  |
| <i>TTN</i> | WS53 | AR | F | missense SNV | 2q31.2 | 179480143 | C | G | TTN:NM_003319:exon87:c.G21334C:p.D7112H,TTN:NM_133432:exon88:c.G21709C:p.D7237H,TTN:NM_133437:exon88:c.G21910C:p.D7304H,TTN:NM_133378:exon208:c.G40825C:p.D13609H,TTN:NM_001256850:exon209:c.G43606C:p.D14536H,TTN:NM_001267550:exon259:c.G48529C:p.D16177H       | 0.0001163                                                                          |  |
| <i>TTN</i> | WS53 | AR | M | missense SNV | 2q31.2 | 179550007 | T | C | TTN:NM_133378:exon126:c.A28711G:p.K9571E,TTN:NM_001256850:exon127:c.A31492G:p.K10498E,TTN:NM_001267550:exon129:c.A32443G:p.K10815E                                                                                                                                | NA                                                                                 |  |

Inherited from: F-father, M-mother, de novo-neither from father or mother; Frequency in gnomAD East Asian:0- not recorded but different variant recorded at the same loci, NA-none variant recorded in this loci

Supplementary Table S7 Treatment detail of patient with candidate variants in calcium signaling pathway genes

| Gene                                                         | <i>ATP2A2</i> | <i>NOS3</i>      | <i>PHKA1</i> | <i>RYR1</i> | <i>RYR2</i>        | <i>RYR3</i>        |
|--------------------------------------------------------------|---------------|------------------|--------------|-------------|--------------------|--------------------|
| Patient ID                                                   | WS16-P        | WS13-P           | WS33-P       | WS21-P      | WS29-P             | WS56-P             |
| Gender                                                       | Male          | Male             | Male         | Female      | Male               | Female             |
| calcium channel blockers<br>related drugs                    | VPA, TPM      | TPM              | LEV          | LEV         | LEV, VPA, TPM      | VPA, TPM, LEV, LTG |
| Effective drugs in calcium<br>channel blockers related drugs | VPA, TPM      | NA               | NA           | NA          | TPM                | VPA, LTG           |
| Other drugs                                                  | ACTH          | prednisone, ACTH | ACTH, VGB    | ACTH        | PHB, ACTH, KD, VGB | NA                 |
| effective drugs in other drugs                               | NA            | ACTH             | ACTH         | ACTH        | VGB                | NA                 |
| Outcome of seizure                                           | controlled    | relapse          | relapse      | controlled  | controlled         | controlled         |

VPA: Valproic acid sodium; TPM: topiramate; LEV: levetiracetam; LTG: lamotrigine; ACTH: Adrenocorticotrophic Hormone; VGB: Vigabatrin; PHB: phenobarbital; KD: ketogenic diet.
